# Supplementary material for: A versatile route to fabricate single atom catalysts with high chemoselectivity and regioselectivity in hydrogenation
Source: PubMed Central journal article supplement (PMC6694111; doi:10.1038/s41467-019-11619-6), 2019-08-14
Supplement: 41467_2019_11619_MOESM1_ESM.pdf [file 41467_2019_11619_MOESM1_ESM.pdf]

Supplementary Information for

**A versatile route to fabricate single atom catalysts with high  
chemoselectivity and regioselectivity in hydrogenation**

He et al.

## Supplementary Methods

**Materials.** All the solvents and chemicals were available from suppliers and used as received unless specially stated.

Dichloromethane (Greagent, 99.5%), hexane (Greagent, 97%), methanol (Greagent, 99.5%), propionic acid (Aladdin, 99.5%), benzaldehyde (Aladdin, 99.5%), *N,N*-dimethylformamide (Aladdin, 99.5%), toluene (ACS reagent, 99.5%), acetic acid (Aladdin, 99.5%), 1,2,4-trichlorobenzene (Aladdin, 99.5%), tetrahydrofuran (Aladdin, 99.5%), triethylamine (Aladdin, 99.5%), *n*-butyllithium solution (Aladdin, 2.5 M in hexanes), benzonitrile (Aladdin, 99%), phenol (Aladdin, 99.5%), decahydronaphthalene (Aladdin, 98%), diphenyl ether (Aladdin, 99.5%), 1-phenyl-1-propyne (Aladdin, 98%), 1-phenyl-1-pentyne (TCI, 97%), 5-decyne (Aladdin, 98%), 1-nitro-4-ethynylbenzene (TCI, 98%), 1-ethynyl-4-vinylbenzene (Chengdu Novel Biochemical Co. Ltd, 98%), 1-ethynyl-4-(phenylethynyl)benzene (Chengdu Novel Biochemical Co. Ltd, 98%), 1-(dec-1-yn-1-yl)-3-ethynylbenzene (Chengdu Novel Biochemical Co. Ltd, 97%). Pyrrole (Aladdin, 99%) was distilled under a N<sub>2</sub> atmosphere before use.

Sodium acetate anhydrous (CH<sub>3</sub>COONa, Aladdin, 99%), titanium(IV) chloride solution (TiCl<sub>4</sub>, J&K, 1.0 M solution in toluene), vanadyl sulfate hydrate (VOSO<sub>4</sub> · xH<sub>2</sub>O, Sigma-Aldrich, 97%), chromium chloride (CrCl<sub>2</sub>, Aladdin, 99%), manganese chloride tetrahydrate (MnCl<sub>2</sub> · 4H<sub>2</sub>O, Aladdin, 99%), iron(II) chloride (FeCl<sub>2</sub>, Aladdin, 99.5%), cobalt(II) acetate tetrahydrate (Co(CH<sub>3</sub>COO)<sub>2</sub> · 4H<sub>2</sub>O, Aladdin, 99.5%), nickel(II) acetate tetrahydrate (Ni(CH<sub>3</sub>COO)<sub>2</sub> · 4H<sub>2</sub>O, Aladdin, 99%), copper(II) acetate monohydrate (Cu(CH<sub>3</sub>COO)<sub>2</sub> · H<sub>2</sub>O, Aladdin, 99%), gallium(III) chloride anhydrous (GaCl<sub>3</sub>, Aladdin, 99.99%), zirconyl chloride octahydrate (ZrOCl<sub>2</sub> · 8H<sub>2</sub>O, Aladdin, 99%), molybdenum

trioxide ( $\text{MoO}_3$ , Aladdin, 99.5%), triruthenium dodecacarbonyl ( $\text{Ru}_3\text{C}_{12}\text{O}_{12}$ , Aladdin, 99%), di- $\mu$ -chloro-tetracarbonyldirrhodium(I) ( $[\text{Rh}(\text{CO})_2\text{Cl}]_2$ , Aladdin, 97%), palladium chloride ( $\text{PdCl}_2$ , Aladdin, Pd 59–60%), silver nitrate ( $\text{AgNO}_3$ , Aladdin, 99.8%), cadmium acetate dihydrate ( $\text{Cd}(\text{CH}_3\text{COO})_2 \cdot 2\text{H}_2\text{O}$ , Aladdin, 99.5%), indium chloride tetrahydrate ( $\text{InCl}_3 \cdot 4\text{H}_2\text{O}$ , Aladdin, 99.9%), tin chloride ( $\text{SnCl}_2$ , Aladdin, 99%), erbium(III) acetylacetonate hydrate ( $\text{Er}(\text{C}_5\text{H}_7\text{O}_2)_3 \cdot x\text{H}_2\text{O}$ , Sigma, 97%), tungsten chloride ( $\text{WCl}_6$ , Aladdin, 99.9%), chloro(1,5-cyclooctadiene)iridium(I) dimer ( $\text{C}_{16}\text{H}_{24}\text{Ir}_2\text{Cl}_2$ , Aladdin, 97%), platinum chloride ( $\text{PtCl}_2$ , Aladdin, Pt $\geq$ 73%), gold chloride trihydrate ( $\text{HAuCl}_4 \cdot 3\text{H}_2\text{O}$ , Aladdin, 99.9%), bismuth nitrate pentahydrate ( $\text{Bi}(\text{NO}_3)_3 \cdot 5\text{H}_2\text{O}$ , Aladdin, 98%), silica gel (Qingdao Haiyang Chemical Plant, 200–300 mesh), aluminum oxide (Aladdin, 200–300 mesh).

**Synthesis of TPP and MTPP.** TPP<sup>1</sup>, TiTPP<sup>2</sup>, VTPP<sup>3</sup>, CrTPP<sup>4</sup>, MnTPP<sup>1</sup>, FeTPP<sup>1</sup>, CoTPP<sup>1</sup>, NiTPP<sup>5</sup>, CuTPP<sup>6</sup>, GaTPP<sup>4</sup>, ZrTPP<sup>7</sup>, MoTPP<sup>8</sup>, RuTPP<sup>9</sup>, RhTPP<sup>10</sup>, PdTPP<sup>11</sup>, AgTPP<sup>12</sup>, CdTPP<sup>13</sup>, InTPP<sup>14</sup>, SnTPP<sup>15</sup>, ErTPP<sup>16</sup>, WTPP<sup>17</sup>, IrTPP<sup>18</sup>, PtTPP<sup>19</sup>, AuTPP<sup>20</sup>, and BiTPP<sup>21</sup> were synthesized according to the reports, respectively. Details were given in the following:

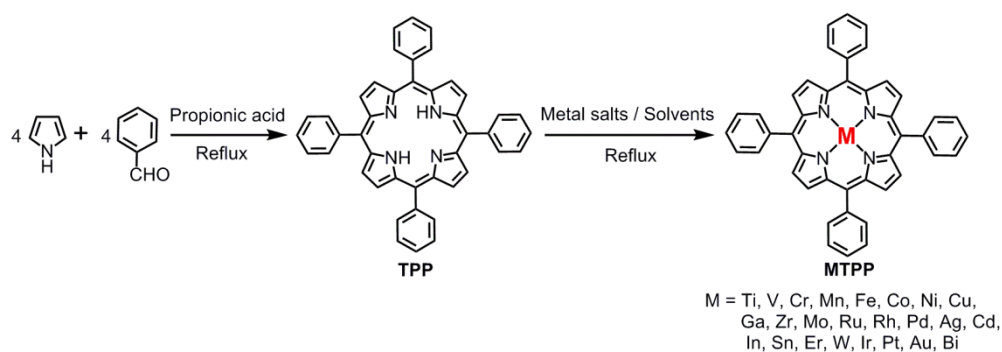

**Supplementary Fig. 1** Schematic illustration of the preparation of TPP and MTPP.

TPP: Typically, benzaldehyde (100 mmol) was added to a two-necked round-bottomed flask (500 mL) containing 250 mL propionic acid, and heated to 140 °C, followed by addition of freshly distilled pyrrole (100 mmol). After refluxing for 3 h, the solution was cooled to room temperature naturally and added 250 mL absolute ethanol. Subsequently, the as-obtained precipitate was filtered, washed with methanol and dried in the air. The precipitate was further purified with silica gel column chromatography using CH<sub>2</sub>Cl<sub>2</sub> as eluent. After removal of eluent by rotary evaporation, the product was dried at 80 °C in vacuum for 24 h and gave the purple powder with the yield of 23%. <sup>1</sup>H NMR (500 MHz, CDCl<sub>3</sub>): δ 8.84 (s, 8H), 8.23–8.21 (d, J = 8.22 Hz, 8H), 7.80–7.73 (m, 12H), -2.78 (s, 2H).

TiTPP: Under the N<sub>2</sub> atmosphere, the as-synthesized TPP (1.0 mmol) was dissolved in 100 mL dry toluene in a 250 mL Schlenk flask and carefully syringed 5 mL n-butyllithium solution (2.5 M in hexanes), followed by stirred for 30 min at room temperature. Then 25 mL titanium(IV) chloride solution (TiCl<sub>4</sub>, 1.0 M solution in toluene) was added by syringe, and stirred for 3 h at 100 °C. The solution was cooled to room temperature naturally, then exposed to air and stirred for 3 h. After removal of solvent by rotary evaporation, the material was further purified by silica gel column chromatography with CH<sub>2</sub>Cl<sub>2</sub> as eluent. The eluent was removed by rotary evaporation and the product was dried at 80 °C in vacuum for 24 h.

VTPP: Under the N<sub>2</sub> atmosphere, the as-synthesized TPP (1.0 mmol) and vanadyl sulfate hydrate (10.0 mmol) were dissolved in 100 mL N,N-dimethylformamide (DMF) in a 250 mL three-necked round-bottomed flask, and refluxed for 3 h at 150 °C, then the solution was cooled to room temperature naturally. After removal of DMF solvent by

rotary evaporation, the material was purified by silica gel column chromatography with  $\text{CH}_2\text{Cl}_2$ /hexanes/MeOH as eluents. The eluents were removed by rotary evaporation and the product was dried at 80 °C in vacuum for 24 h.

Similarly, MTPP (M = Cr, Mn, Fe, Co, Ni, Cu, Ga, Pd, Ag, Cd, In, Sn, Er, and Bi) were also synthesized with the same procedure of VTPP and different metal salts (chromium chloride, manganese chloride tetrahydrate, iron(II) chloride, cobalt(II) acetate tetrahydrate, nickel(II) acetate tetrahydrate, copper(II) acetate monohydrate, gallium(III) chloride anhydrous, palladium chloride, silver nitrate, cadmium acetate dehydrate, indium chloride tetrahydrate, tin chloride, erbium(III) acetylacetonate hydrate, bismuth nitrate pentahydrate), respectively.

Besides, MTPP (M = Zr, Mo, Ru, Rh, W, Ir, and Pt) were also synthesized with the same procedure of VTPP and different metal salts and solvents, respectively. Details were given in the following:

For ZrTPP: zirconyl chloride octahydrate, benzonitrile.

For MoTPP: molybdenum trioxide, phenol.

For RuTPP: molybdenum trioxide, decahydronaphthalene.

For RhTPP: di- $\mu$ -chloro-tetracarbonyldirhodium(I), dry toluene.

For WTPP: tungsten chloride, phenol.

For IrTPP: chloro(1,5-cyclooctadiene)iridium(I) dimer, 1,2,4-trichlorobenzene.

For PtTPP: platinum chloride, diphenyl ether.

AuTPP: Under the  $\text{N}_2$  atmosphere, the as-synthesized TPP (1.0 mmol), gold chloride trihydrate (10.0 mmol) and sodium acetate anhydrous were dissolved in 100 mL acetic acid in a 250 mL three-necked round-bottomed flask, and refluxed for 12 h at 120 °C, then the

solution was cooled to room temperature naturally. The solvent was removed by rotary evaporation and  $\text{CH}_2\text{Cl}_2$  was added. After washing with 10% aqueous  $\text{Na}_2\text{CO}_3$  and water, the solution was dried by  $\text{MgSO}_4$  and removed the solvent by rotary evaporation. Subsequently, the as-obtained material was further purified by silica gel column chromatography with  $\text{CH}_2\text{Cl}_2/\text{hexanes}/\text{MeOH}$  as eluents. The eluents was removed by rotary evaporation and the product was dried at  $80\text{ }^\circ\text{C}$  in vacuum for 24 h.

**Synthesis of  $\text{M}_1/\text{N-C}$ ,  $\text{Pt-NPs}/\text{N-C}(1:0)$ ,  $\text{N-C}$ , and  $\text{Pt}_1\text{-Sn}_1/\text{N-C}$ .** A series of  $\text{M}_1/\text{N-C}$ ,  $\text{Pt-NPs}/\text{N-C}(1:0)$ ,  $\text{N-C}$ , and  $\text{Pt}_1\text{-Sn}_1/\text{N-C}$  catalysts were prepared with similar procedure of  $\text{Pt}_1/\text{N-C}$ , and the detailed precursors ratios (MTPP:TPP, mol:mol) were also given in the following.

For  $\text{M}_1/\text{N-C}$  (M = Mn, Fe, Co, In, Er), MTPP:TPP = 1:0;

For  $\text{M}_1/\text{N-C}$  (M = Ni, Ga, Zr), MTPP:TPP = 1:10;

For  $\text{M}_1/\text{N-C}$  (M = Ag, Bi), MTPP:TPP = 1:20;

For  $\text{M}_1/\text{N-C}$  (M = Ti, V, Cr, Cu, Mo, Ru, Pd, Cd, Sn, W, Ir, Pt), MTPP:TPP = 1:40;

For  $\text{M}_1/\text{N-C}$  (M = Rh), MTPP:TPP = 1:80;

For  $\text{M}_1/\text{N-C}$  (M = Au), MTPP:TPP = 1:160;

For  $\text{Pt}_1/\text{N-C}$  (1:320), PtTPP:TPP = 1:320;

For  $\text{Pt}_1/\text{N-C}$  (1:80), PtTPP:TPP = 1:80;

For  $\text{Pt}_1/\text{N-C}$  (1:20), PtTPP:TPP = 1:20;

For  $\text{Pt-NPs}/\text{N-C}$  (1:0), PtTPP:TPP = 1:0;

For  $\text{N-C}$ , MTPP:TPP = 0:1;

For  $\text{Pt}_1\text{-Sn}_1/\text{N-C}$ , PtTPP:SnTPP:TPP = 1:1:40.

**Synthesis of Pt-NCs/N-C and Pt-NPs/N-C.** The preparation processes for Pt-NCs/N-C and Pt-NPs/N-C were the same as that for Pt<sub>1</sub>/N-C except the pyrolysis temperatures that Pt-NCs/N-C and Pt-NPs/N-C were obtained by treating the as-prepared polymers under flowing nitrogen gas at 700 °C and 800 °C for 3 h, respectively.

1-ethynyl-4-(phenylethynyl)benzene 3# (Supplementary Figs. 40–41): <sup>1</sup>H NMR (500 MHz, CDCl<sub>3</sub>): δ 7.55–7.52 (m, 2H), 7.50–7.46 (m, 4H), 7.38–7.35 (m, 3H), 3.18 (s, 1H); <sup>13</sup>C NMR (125 MHz, CDCl<sub>3</sub>): δ 132.2, 131.8, 131.6, 128.7, 128.5, 123.9, 123.1, 122.0, 91.5, 89.0, 83.4, 79.0; HRMS (m/z): [M+H]<sup>+</sup> calcd. for C<sub>16</sub>H<sub>11</sub>, 203.0855; found, 203.0854.

1-(phenylethynyl)-4-vinylbenzene 3a (Supplementary Figs. 42–43): <sup>1</sup>H NMR (500 MHz, CDCl<sub>3</sub>): δ 7.55–7.52 (m, 2H), 7.51–7.49 (d, J = 7.49 Hz, 2H), 7.40–7.39 (d, J = 7.40 Hz, 2H), 7.37–7.33 (m, 3H), 6.75–6.69 (m, 1H), 5.81–5.77 (d, J = 5.79 Hz, 1H), 5.32–5.29 (d, J = 5.30 Hz, 1H); <sup>13</sup>C NMR (125 MHz, CDCl<sub>3</sub>): δ 137.6, 136.4, 131.9, 131.7, 128.5, 128.4, 126.3, 123.4, 122.7, 114.9, 90.2, 89.6; HRMS (m/z): [M+H]<sup>+</sup> calcd. for C<sub>16</sub>H<sub>13</sub>, 205.1011; found, 205.1011.

1-ethyl-4-(phenylethynyl)benzene 3b (Supplementary Figs. 44–45): <sup>1</sup>H NMR (500 MHz, CDCl<sub>3</sub>): δ 7.58–7.56 (m, 2H), 7.51–7.49 (d, J = 7.50 Hz, 2H), 7.39–7.33 (m, 3H), 7.22–7.21 (d, J = 7.21 Hz, 2H), 2.72–2.67 (m, 2H), 1.30–1.26 (m, 3H); <sup>13</sup>C NMR (125 MHz, CDCl<sub>3</sub>): δ 144.8, 131.7, 131.7, 128.4, 128.2, 128.0, 123.6, 120.6, 89.7, 88.9, 29.0, 15.5; HRMS (m/z): [M+H]<sup>+</sup> calcd. for C<sub>16</sub>H<sub>15</sub>, 207.1168; found, 207.1168.

1-styryl-4-vinylbenzene 3c (Supplementary Figs. 46–47): <sup>1</sup>H NMR (500 MHz, CDCl<sub>3</sub>): δ 7.54–7.52 (d, J = 7.53 Hz, 2H), 7.50–7.48 (d, J = 7.49 Hz, 2H), 7.43–7.41 (d, J = 7.42 Hz, 2H), 7.39–7.36 (m, 2H), 7.29–7.27 (m, 1H), 7.15–7.08 (m, 2H), 6.76–6.71 (m,

1H), 5.80–5.76 (d, J = 5.78 Hz, 1H), 5.28–5.26 (d, J = 5.27 Hz, 1H); <sup>13</sup>C NMR (125 MHz, CDCl<sub>3</sub>): δ 137.4, 137.0, 137.0, 136.6, 128.8, 128.8, 128.4, 127.8, 126.8, 126.7, 126.6, 113.9; HRMS (m/z): [M+H]<sup>+</sup> calcd. for C<sub>16</sub>H<sub>15</sub>, 207.1168; found, 207.1169.

1-(dec-1-yn-1-yl)-3-ethynylbenzene 4# (Supplementary Figs. 48–49): <sup>1</sup>H NMR (500 MHz, CDCl<sub>3</sub>): δ 7.53 (s, 1H), 7.39–7.36 (m, 2H), 7.25–7.22 (m, 1H), 3.06 (s, 1H), 2.41–2.38 (m, 2H), 1.63–1.57 (m, 2H), 1.46–1.43 (m, 2H), 1.32–1.30 (m, 8H), 0.91–0.89 (m, 3H); <sup>13</sup>C NMR (125 MHz, CDCl<sub>3</sub>): δ 135.2, 132.0, 131.2, 128.4, 124.6, 122.4, 91.5, 83.1, 79.8, 77.6, 32.0, 29.4, 29.3, 29.1, 28.8, 22.8, 19.5, 14.3; HRMS (m/z): [M+H]<sup>+</sup> calcd. for C<sub>18</sub>H<sub>23</sub>, 239.1794; found, 239.1793.

1-(dec-1-yn-1-yl)-3-vinylbenzene 4a (Supplementary Figs. 50–51): <sup>1</sup>H NMR (500 MHz, CDCl<sub>3</sub>): δ 7.44 (s, 1H), 7.31–7.27 (m, 2H), 7.25–7.22 (m, 1H), 6.69–6.63 (m, 1H), 5.76–5.73 (d, J = 5.75 Hz, 1H), 5.27–5.24 (d, J = 5.25 Hz, 1H), 2.42–2.39 (m, 2H), 1.64–1.58 (m, 2H), 1.48–1.42 (m, 2H), 1.34–1.26 (m, 8H), 0.90–0.87 (m, 3H); <sup>13</sup>C NMR (125 MHz, CDCl<sub>3</sub>): δ 137.7, 136.4, 131.0, 129.5, 128.5, 125.5, 124.5, 114.5, 90.7, 80.5, 32.0, 29.4, 29.3, 29.1, 28.9, 22.8, 19.6, 14.3; HRMS (m/z): [M+H]<sup>+</sup> calcd. for C<sub>18</sub>H<sub>25</sub>, 241.1951; found, 241.1949.

1-(dec-1-en-1-yl)-3-vinylbenzene 4b (Supplementary Figs. 52–53): <sup>1</sup>H NMR (500 MHz, CDCl<sub>3</sub>): δ 7.43 (s, 1H), 7.37–7.30 (m, 3H), 6.80–6.73 (m, 1H), 6.45–6.41 (d, J = 6.43 Hz, 1H), 6.33–6.26 (m, 1H), 5.83–5.79 (d, J = 5.81 Hz, 1H), 5.31–5.28 (d, J = 5.29 Hz, 1H), 2.29–2.24 (m, 2H), 1.56–1.49 (m, 2H), 1.39–1.35 (m, 10H), 0.97–0.94 (m, 3H); <sup>13</sup>C NMR (125 MHz, CDCl<sub>3</sub>): δ 138.3, 137.8, 137.0, 131.7, 129.6, 128.8, 125.5, 124.7, 124.1, 113.9, 33.2, 32.1, 29.7, 29.5, 29.5, 29.4, 22.8, 14.3; HRMS (m/z): [M+H]<sup>+</sup> calcd. for C<sub>18</sub>H<sub>27</sub>, 243.2107; found, 243.2106.



1-decyl-3-ethynylbenzene 4c (Supplementary Figs. 54–55):  $^1\text{H}$  NMR (500 MHz,  $\text{CDCl}_3$ ):  $\delta$  7.32–7.30 (m, 2H), 7.25–7.21 (m, 1H), 7.18–7.15 (m, 1H), 3.05 (s, 1H), 2.61–2.56 (m, 2H), 1.63–1.57 (m, 2H), 1.39–1.26 (m, 14H), 0.94–0.86 (m, 3H);  $^{13}\text{C}$  NMR (125 MHz,  $\text{CDCl}_3$ ):  $\delta$  143.2, 132.2, 129.6, 129.2, 128.3, 122.0, 84.1, 76.8, 35.8, 32.1, 31.4, 29.9, 29.7, 29.6, 29.5, 29.4, 22.8, 14.3; HRMS (m/z):  $[\text{M}+\text{H}]^+$  calcd. for  $\text{C}_{18}\text{H}_{27}$ , 243.2107; found, 243.2106.

1-(dec-1-en-1-yl)-3-ethylbenzene 4d (Supplementary Figs. 56–57):  $^1\text{H}$  NMR (500 MHz,  $\text{CDCl}_3$ ):  $\delta$  7.23–7.16 (m, 3H), 7.05–7.03 (d,  $J = 7.04$  Hz, 1H), 6.38–6.34 (d,  $J = 6.36$  Hz, 1H), 6.26–6.18 (m, 1H), 2.66–2.60 (m, 2H), 2.23–2.17 (m, 2H), 1.50–1.43 (m, 2H), 1.35–1.22 (m, 13H), 0.90–0.87 (m, 3H);  $^{13}\text{C}$  NMR (125 MHz,  $\text{CDCl}_3$ ):  $\delta$  144.5, 138.1, 131.2, 130.0, 128.6, 126.5, 125.6, 123.4, 33.2, 32.1, 29.7, 29.6, 29.5, 29.4, 29.0, 22.8, 15.8, 14.3; HRMS (m/z):  $[\text{M}+\text{H}]^+$  calcd. for  $\text{C}_{18}\text{H}_{29}$ , 245.2264; found, 245.2267.

1-decyl-3-vinylbenzene 4e (Supplementary Figs. 58–59):  $^1\text{H}$  NMR (500 MHz,  $\text{CDCl}_3$ ):  $\delta$  7.08–7.07 (m,  $J = 7.08$  Hz, 3H), 6.93–6.91 (m, 1H), 6.58–6.51 (m, 1H), 5.61–6.56 (d,  $J = 5.58$  Hz, 1H), 5.08–5.05 (d,  $J = 5.07$  Hz, 1H), 2.46–2.42 (m, 2H), 1.50–1.42 (m, 2H), 1.16–1.11 (m, 14H), 0.75–0.71 (m, 3H);  $^{13}\text{C}$  NMR (125 MHz,  $\text{CDCl}_3$ ):  $\delta$  143.3, 137.6, 137.2, 128.5, 128.1, 126.5, 123.7, 113.6, 36.1, 32.1, 31.7, 29.8, 29.8, 29.7, 29.5, 29.5, 22.9, 14.3; HRMS (m/z):  $[\text{M}+\text{H}]^+$  calcd. for  $\text{C}_{18}\text{H}_{29}$ , 245.2264; found, 245.2261.

1-decyl-3-ethylbenzene 4f (Supplementary Figs. 60–61):  $^1\text{H}$  NMR (500 MHz,  $\text{CDCl}_3$ ):  $\delta$  7.25–7.22 (m, 1H), 7.06–7.03 (m, 3H), 2.69–2.60 (m, 4H), 1.68–1.62 (m, 2H), 1.36–1.26 (m, 17H), 0.94–0.91 (m, 3H);  $^{13}\text{C}$  NMR (125 MHz,  $\text{CDCl}_3$ ):  $\delta$  144.3, 143.1, 128.3, 128.2, 125.8, 125.2, 36.2, 32.1, 31.8, 29.8, 29.7, 29.6, 29.5, 29.0, 22.9, 15.8, 14.3; HRMS (m/z):  $[\text{M}+\text{H}]^+$  calcd. for  $\text{C}_{18}\text{H}_{31}$ , 247.2420; found, 247.2418.

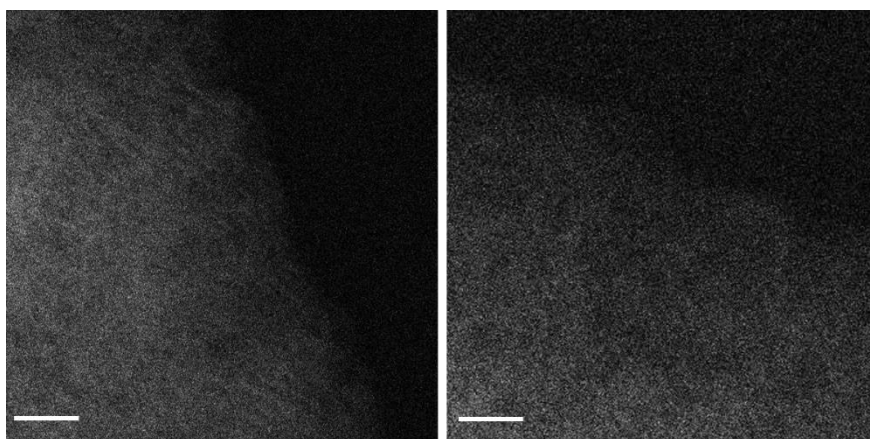

**Supplementary Fig. 2** AC HAADF-STEM of N-C. Scale bar, 2 nm.

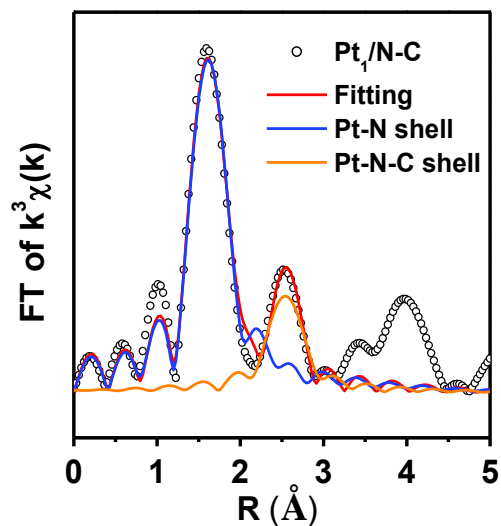

**Supplementary Fig. 3** Fourier transform (FT)  $k^3$ -weighted  $\chi(k)$ -function of the EXAFS spectra for Pt  $L_{3}$ -edge and corresponding R-space fitting curves for the Pt<sub>1</sub>/N-C catalyst.

**Supplementary Table 1.** Structural Parameter of EXAFS fitting for the Pt<sub>1</sub>/N-C

| Sample               | Shell  | C.N. <sup>a</sup> | R (Å) <sup>b</sup> | $\sigma^2 (\times 10^{-3} \text{Å}^2)$ <sup>c</sup> | $E_0$ (eV) <sup>d</sup> |
|----------------------|--------|-------------------|--------------------|-----------------------------------------------------|-------------------------|
| Pt <sub>1</sub> /N-C | Pt-N   | 3.4               | 2.03±0.02          | 3                                                   | 0.7                     |
|                      | Pt-N-C | 2.2               | 2.98±0.04          | 2.5                                                 | 5.4                     |

<sup>a</sup> C.N.: coordination number; <sup>b</sup> R: bond distance; <sup>c</sup>  $\sigma^2$ : Debye-waller factors; <sup>d</sup>  $E_0$ : the inner potential correction.

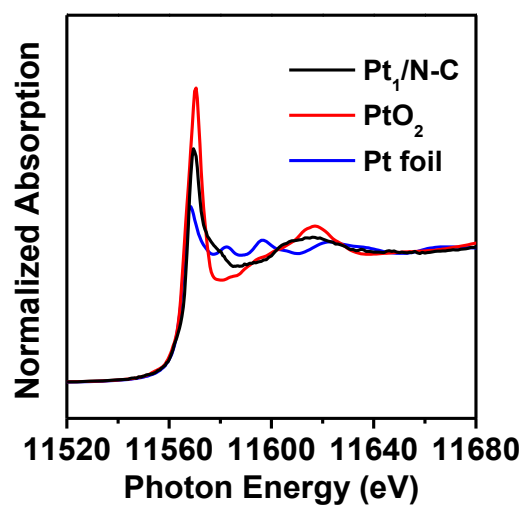

**Supplementary Fig. 4** XANES Pt L<sub>3</sub> edge for Pt<sub>1</sub>/N-C, PtO<sub>2</sub>, and Pt foil.

**Supplementary Table 2.** Pt content, N content, BET surface area for Pt<sub>1</sub>/N-C

| Pt (wt%) <sup>a</sup> | N (wt%) <sup>b</sup> | BET surface area (m <sup>2</sup> g <sup>-1</sup> ) <sup>c</sup> |
|-----------------------|----------------------|-----------------------------------------------------------------|
| 0.43                  | 5.17                 | 595                                                             |

<sup>a</sup> ICP-OES. <sup>b</sup> EA. <sup>c</sup> Sorption isotherm of N<sub>2</sub> at 77 K.

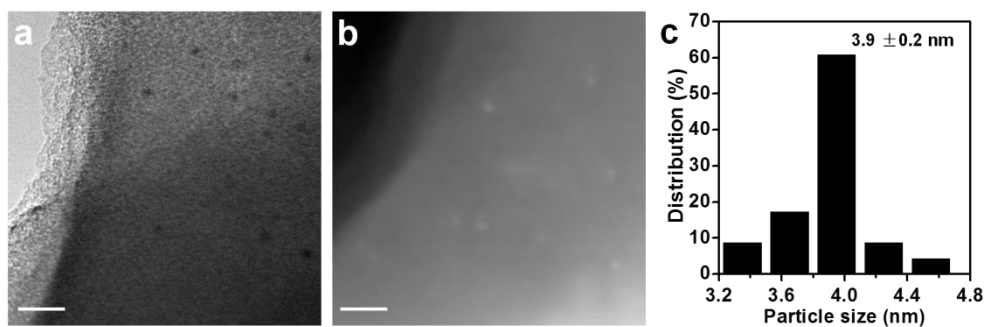

**Supplementary Fig. 5** a TEM image, b STEM image, and c particle size distribution of Pt-NPs/N-C(1:0). Scale bar, 20 nm.

**Supplementary Table 3.** Pt content, N content, BET surface area for Pt-NPs/N-C

| Pt (wt%) <sup>a</sup> | N (wt%) <sup>b</sup> | BET surface area (m <sup>2</sup> g <sup>-1</sup> ) <sup>c</sup> |
|-----------------------|----------------------|-----------------------------------------------------------------|
| 3.31                  | 4.63                 | 700                                                             |

<sup>a</sup> ICP-OES. <sup>b</sup> EA. <sup>c</sup> Sorption isotherm of N<sub>2</sub> at 77 K.

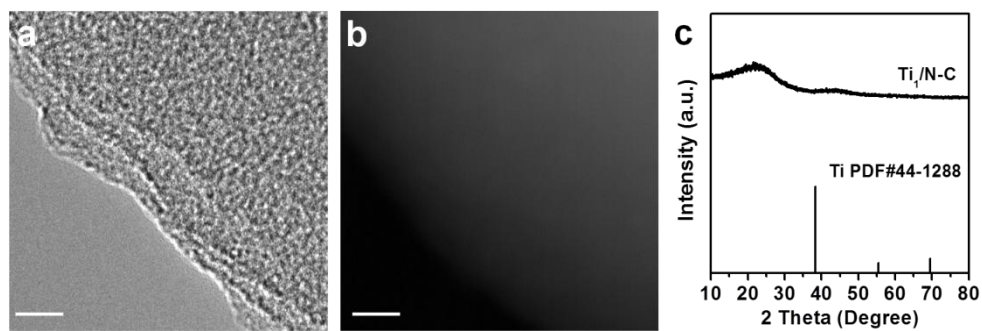

**Supplementary Fig. 6** a TEM image, b STEM image, and c XRD pattern of Ti<sub>1</sub>/N-C.

Scale bar, 10 nm.

**Supplementary Table 4.** Ti content, N content, BET surface area for Ti<sub>1</sub>/N-C

| Ti (wt%) <sup>a</sup> | N (wt%) <sup>b</sup> | BET surface area (m <sup>2</sup> g <sup>-1</sup> ) <sup>c</sup> |
|-----------------------|----------------------|-----------------------------------------------------------------|
| 0.12                  | 4.57                 | 587                                                             |

<sup>a</sup> ICP-OES. <sup>b</sup> EA. <sup>c</sup> Sorption isotherm of N<sub>2</sub> at 77 K.

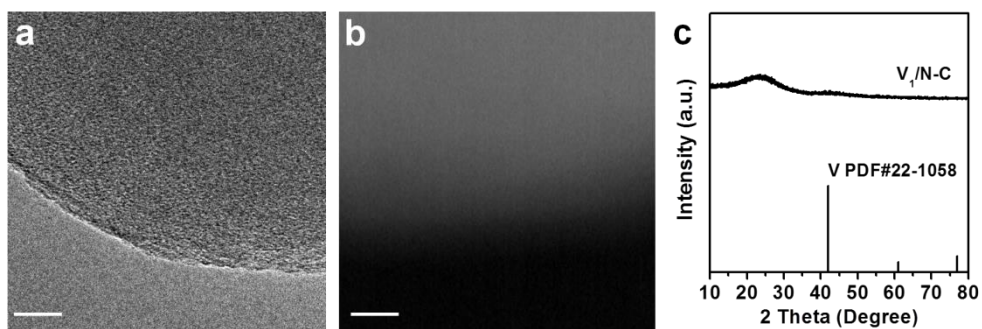

**Supplementary Fig. 7** **a** TEM image, **b** STEM image, and **c** XRD pattern of  $V_1/N-C$ .

Scale bar, 10 nm.

**Supplementary Table 5.** V content, N content, BET surface area for  $V_1/N-C$

| V (wt%) <sup>a</sup> | N (wt%) <sup>b</sup> | BET surface area (m <sup>2</sup> g <sup>-1</sup> ) <sup>c</sup> |
|----------------------|----------------------|-----------------------------------------------------------------|
| 0.19                 | 5.05                 | 656                                                             |

<sup>a</sup> ICP-OES. <sup>b</sup> EA. <sup>c</sup> Sorption isotherm of N<sub>2</sub> at 77 K.

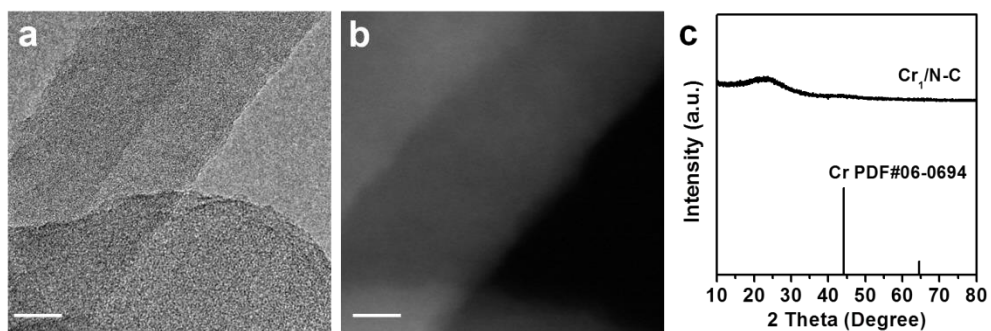

**Supplementary Fig. 8** a TEM image, b STEM image, and c XRD pattern of Cr<sub>1</sub>/N-C.

Scale bar, 10 nm.

**Supplementary Table 6.** Cr content, N content, BET surface area for Cr<sub>1</sub>/N-C

| Cr (wt%) <sup>a</sup> | N (wt%) <sup>b</sup> | BET surface area (m <sup>2</sup> g <sup>-1</sup> ) <sup>c</sup> |
|-----------------------|----------------------|-----------------------------------------------------------------|
| 0.10                  | 5.08                 | 792                                                             |

<sup>a</sup> ICP-OES. <sup>b</sup> EA. <sup>c</sup> Sorption isotherm of N<sub>2</sub> at 77 K.



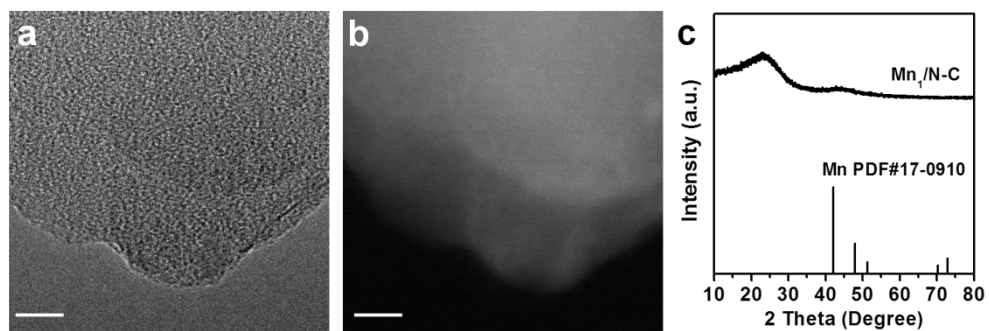

**Supplementary Fig. 9** **a** TEM image, **b** STEM image, and **c** XRD pattern of Mn<sub>1</sub>/N-C. Scale bar, 10 nm.

**Supplementary Table 7.** Mn content, N content, BET surface area for Mn<sub>1</sub>/N-C

| Mn (wt%) <sup>a</sup> | N (wt%) <sup>b</sup> | BET surface area (m <sup>2</sup> g <sup>-1</sup> ) <sup>c</sup> |
|-----------------------|----------------------|-----------------------------------------------------------------|
| 0.07                  | 4.44                 | 790                                                             |

<sup>a</sup> ICP-OES. <sup>b</sup> EA. <sup>c</sup> Sorption isotherm of N<sub>2</sub> at 77 K.

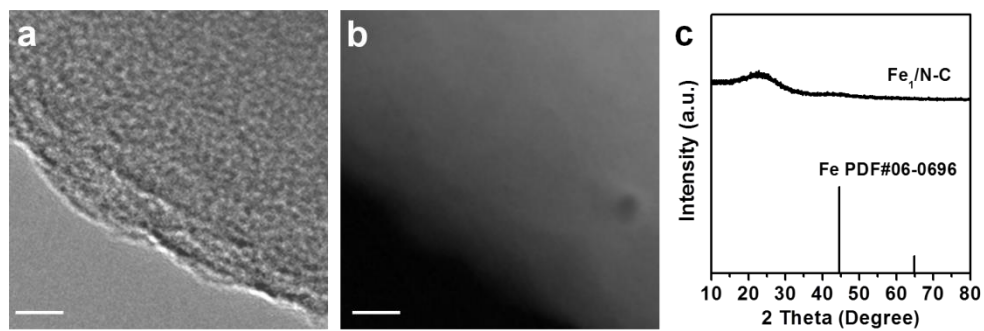

**Supplementary Fig. 10** **a** TEM image, **b** STEM image, and **c** XRD pattern of Fe<sub>1</sub>/N-C. Scale bar, 10 nm.

**Supplementary Table 8.** Fe content, N content, BET surface area for Fe<sub>1</sub>/N-C

| Fe (wt%) <sup>a</sup> | N (wt%) <sup>b</sup> | BET surface area (m <sup>2</sup> g <sup>-1</sup> ) <sup>c</sup> |
|-----------------------|----------------------|-----------------------------------------------------------------|
| 0.18                  | 5.00                 | 784                                                             |

<sup>a</sup> ICP-OES. <sup>b</sup> EA. <sup>c</sup> Sorption isotherm of N<sub>2</sub> at 77 K.

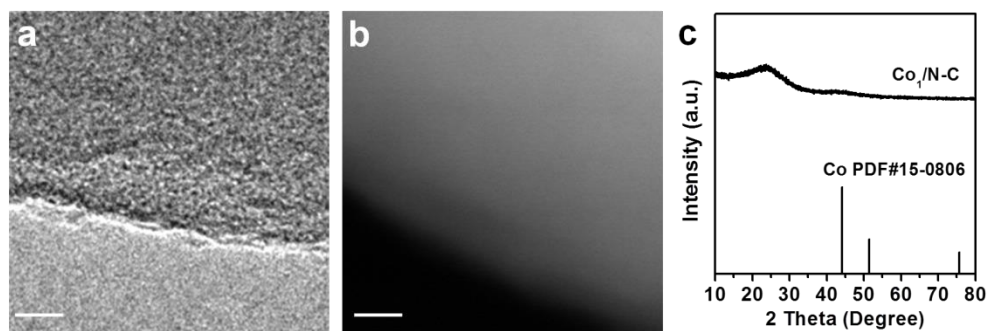

**Supplementary Fig. 11** **a** TEM image, **b** STEM image, and **c** XRD pattern of  $\text{Co}_1/\text{N-C}$ . Scale bar, 10 nm.

**Supplementary Table 9.** Co content, N content, BET surface area for  $\text{Co}_1/\text{N-C}$

| Co (wt%) <sup>a</sup> | N (wt%) <sup>b</sup> | BET surface area ( $\text{m}^2\text{g}^{-1}$ ) <sup>c</sup> |
|-----------------------|----------------------|-------------------------------------------------------------|
| 0.20                  | 4.86                 | 834                                                         |

<sup>a</sup> ICP-OES. <sup>b</sup> EA. <sup>c</sup> Sorption isotherm of  $\text{N}_2$  at 77 K.

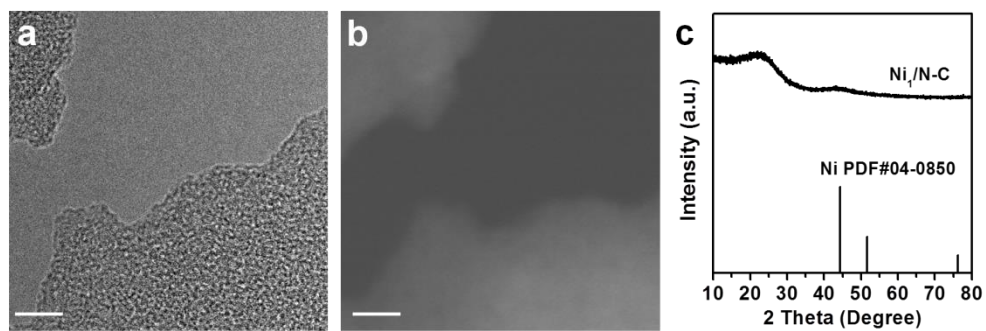

**Supplementary Fig. 12** **a** TEM image, **b** STEM image, and **c** XRD pattern of Ni<sub>1</sub>/N-C. Scale bar, 10 nm.

**Supplementary Table 10.** Ni content, N content, BET surface area for Ni<sub>1</sub>/N-C

| Ni (wt%) <sup>a</sup> | N (wt%) <sup>b</sup> | BET surface area (m <sup>2</sup> g <sup>-1</sup> ) <sup>c</sup> |
|-----------------------|----------------------|-----------------------------------------------------------------|
| 0.22                  | 5.03                 | 677                                                             |

<sup>a</sup> ICP-OES. <sup>b</sup> EA. <sup>c</sup> Sorption isotherm of N<sub>2</sub> at 77 K.

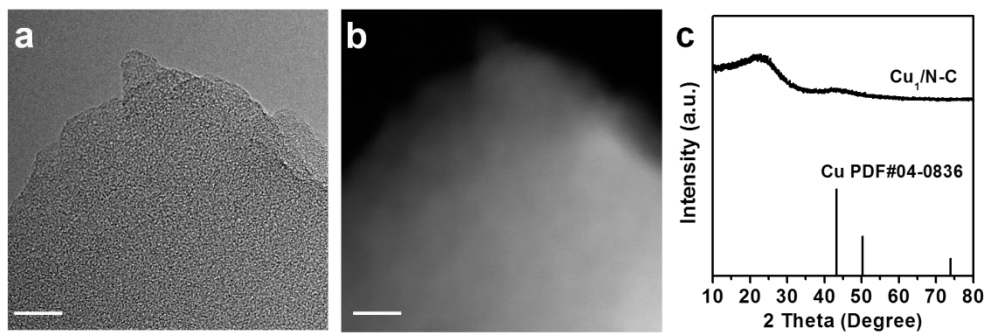

**Supplementary Fig. 13** **a** TEM image, **b** STEM image, and **c** XRD pattern of Cu<sub>1</sub>/N-C. Scale bar, 10 nm.

**Supplementary Table 11.** Cu content, N content, BET surface area for Cu<sub>1</sub>/N-C

| Cu (wt%) <sup>a</sup> | N (wt%) <sup>b</sup> | BET surface area (m <sup>2</sup> g <sup>-1</sup> ) <sup>c</sup> |
|-----------------------|----------------------|-----------------------------------------------------------------|
| 0.21                  | 5.13                 | 746                                                             |

<sup>a</sup> ICP-OES. <sup>b</sup> EA. <sup>c</sup> Sorption isotherm of N<sub>2</sub> at 77 K.

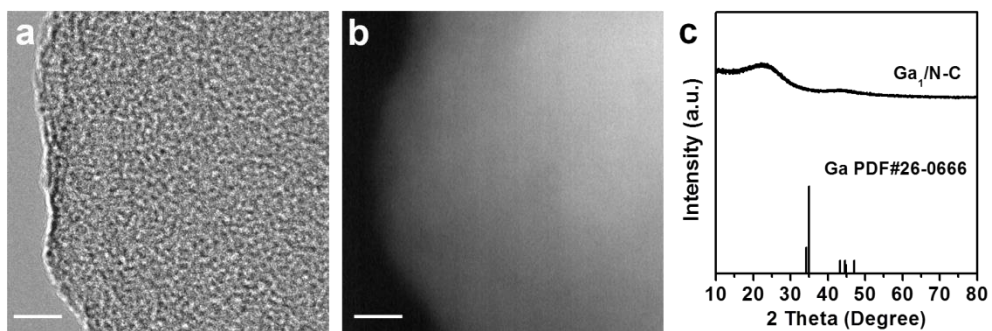

**Supplementary Fig. 14** **a** TEM image, **b** STEM image, and **c** XRD pattern of Ga<sub>1</sub>/N-C. Scale bar, 10 nm.

**Supplementary Table 12.** Ga content, N content, BET surface area for Ga<sub>1</sub>/N-C

| Ga (wt%) <sup>a</sup> | N (wt%) <sup>b</sup> | BET surface area (m <sup>2</sup> g <sup>-1</sup> ) <sup>c</sup> |
|-----------------------|----------------------|-----------------------------------------------------------------|
| 0.06                  | 4.68                 | 841                                                             |

<sup>a</sup> ICP-OES. <sup>b</sup> EA. <sup>c</sup> Sorption isotherm of N<sub>2</sub> at 77 K.

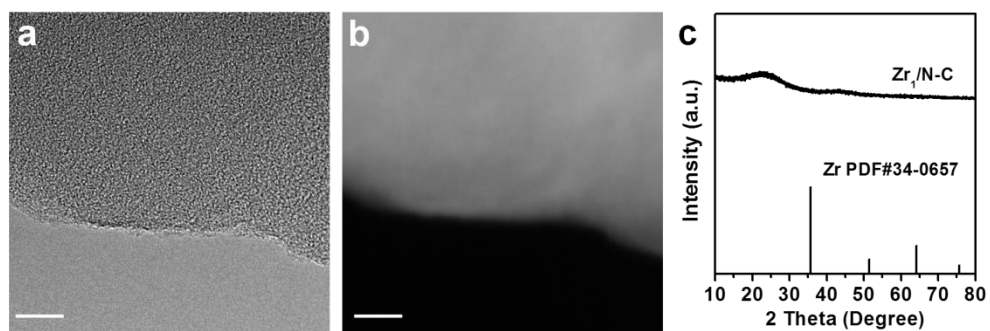

**Supplementary Fig. 15** **a** TEM image, **b** STEM image, and **c** XRD pattern of Zr<sub>1</sub>/N-C. Scale bar, 10 nm.

**Supplementary Table 13.** Zr content, N content, BET surface area for Zr<sub>1</sub>/N-C

| Zr (wt%) <sup>a</sup> | N (wt%) <sup>b</sup> | BET surface area (m <sup>2</sup> g <sup>-1</sup> ) <sup>c</sup> |
|-----------------------|----------------------|-----------------------------------------------------------------|
| 0.05                  | 4.62                 | 524                                                             |

<sup>a</sup> ICP-OES. <sup>b</sup> EA. <sup>c</sup> Sorption isotherm of N<sub>2</sub> at 77 K.

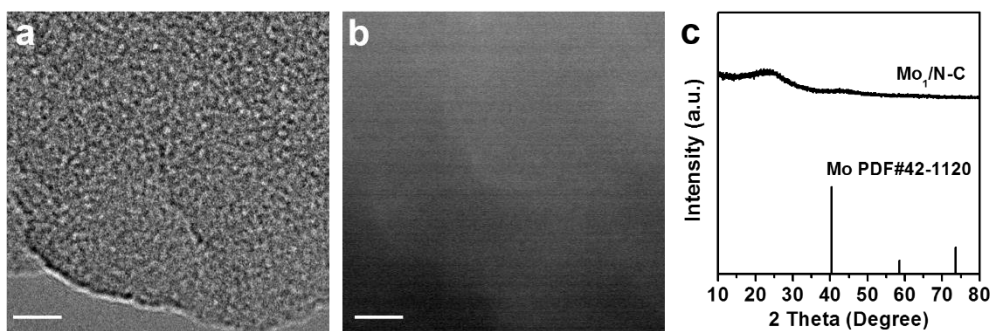

**Supplementary Fig. 16** a TEM image, b STEM image, and c XRD pattern of Mo<sub>1</sub>/N-

C. Scale bar, 10 nm.

**Supplementary Table 14.** Mo content, N content, BET surface area for Mo<sub>1</sub>/N-C

| Mo (wt%) <sup>a</sup> | N (wt%) <sup>b</sup> | BET surface area (m <sup>2</sup> g <sup>-1</sup> ) <sup>c</sup> |
|-----------------------|----------------------|-----------------------------------------------------------------|
| 0.15                  | 4.90                 | 567                                                             |

<sup>a</sup> ICP-OES. <sup>b</sup> EA. <sup>c</sup> Sorption isotherm of N<sub>2</sub> at 77 K.



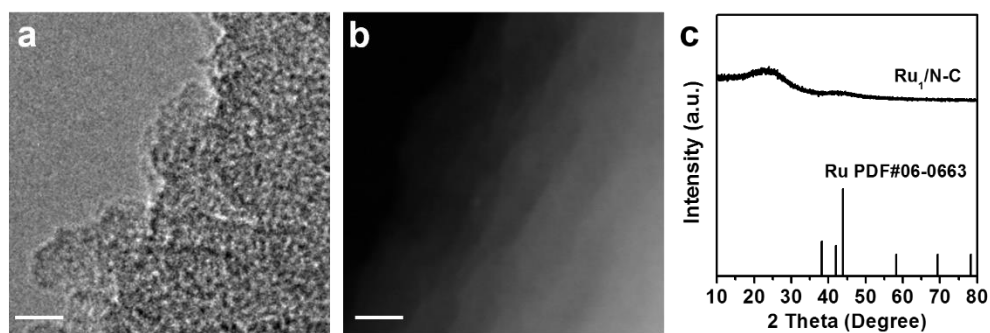

**Supplementary Fig. 17** a TEM image, b STEM image, and c XRD pattern of Ru<sub>1</sub>/N-C. Scale bar, 10 nm.

**Supplementary Table 15.** Ru content, N content, BET surface area for Ru<sub>1</sub>/N-C

| Ru (wt%) <sup>a</sup> | N (wt%) <sup>b</sup> | BET surface area (m <sup>2</sup> g <sup>-1</sup> ) <sup>c</sup> |
|-----------------------|----------------------|-----------------------------------------------------------------|
| 0.10                  | 5.01                 | 877                                                             |

<sup>a</sup> ICP-OES. <sup>b</sup> EA. <sup>c</sup> Sorption isotherm of N<sub>2</sub> at 77 K.

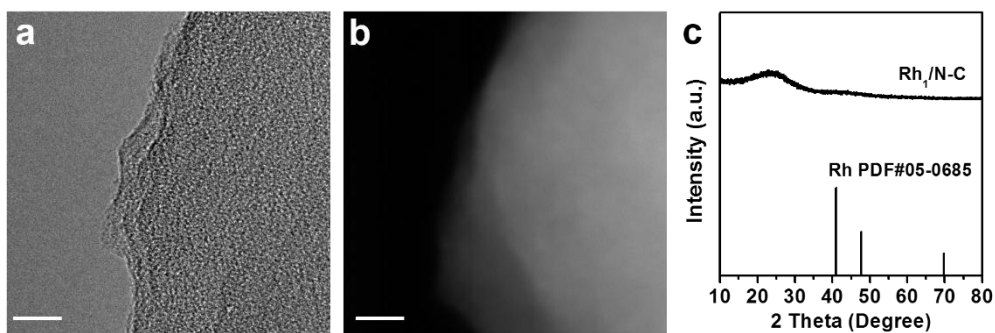

**Supplementary Fig. 18** a TEM image, b STEM image, and c XRD pattern of Rh<sub>1</sub>/N-

C. Scale bar, 10 nm.

**Supplementary Table 16.** Rh content, N content, BET surface area for Rh<sub>1</sub>/N-C

| Rh (wt%) <sup>a</sup> | N (wt%) <sup>b</sup> | BET surface area (m <sup>2</sup> g <sup>-1</sup> ) <sup>c</sup> |
|-----------------------|----------------------|-----------------------------------------------------------------|
| 0.08                  | 4.67                 | 869                                                             |

<sup>a</sup> ICP-OES. <sup>b</sup> EA. <sup>c</sup> Sorption isotherm of N<sub>2</sub> at 77 K.

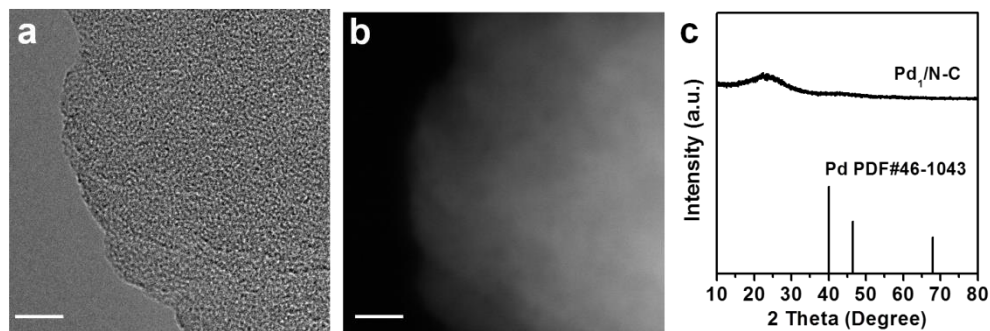

**Supplementary Fig. 19** a TEM image, b STEM image, and c XRD pattern of Pd<sub>1</sub>/N-C. Scale bar, 10 nm.

**Supplementary Table 17.** Pd content, N content, BET surface area for Pd<sub>1</sub>/N-C

| Pd (wt%) <sup>a</sup> | N (wt%) <sup>b</sup> | BET surface area (m <sup>2</sup> g <sup>-1</sup> ) <sup>c</sup> |
|-----------------------|----------------------|-----------------------------------------------------------------|
| 0.30                  | 4.98                 | 682                                                             |

<sup>a</sup> ICP-OES. <sup>b</sup> EA. <sup>c</sup> Sorption isotherm of N<sub>2</sub> at 77 K.

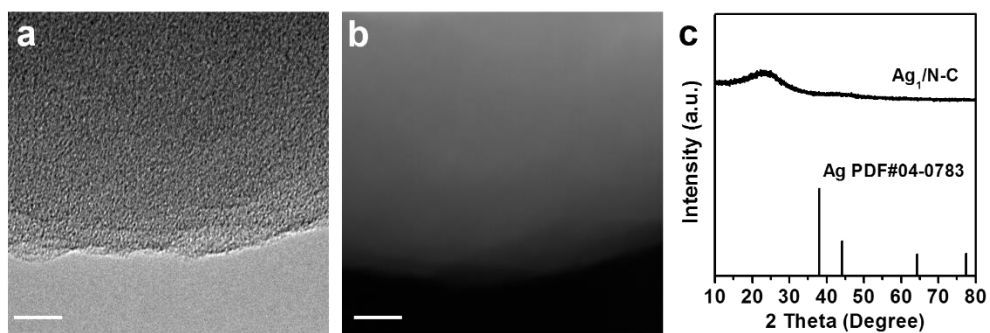

**Supplementary Fig. 20** a TEM image, b STEM image, and c XRD pattern of Ag<sub>1</sub>/N-C. Scale bar, 10 nm.

**Supplementary Table 18.** Ag content, N content, BET surface area for Ag<sub>1</sub>/N-C

| Ag (wt%) <sup>a</sup> | N (wt%) <sup>b</sup> | BET surface area (m <sup>2</sup> g <sup>-1</sup> ) <sup>c</sup> |
|-----------------------|----------------------|-----------------------------------------------------------------|
| 0.06                  | 4.95                 | 799                                                             |

<sup>a</sup> ICP-OES. <sup>b</sup> EA. <sup>c</sup> Sorption isotherm of N<sub>2</sub> at 77 K.

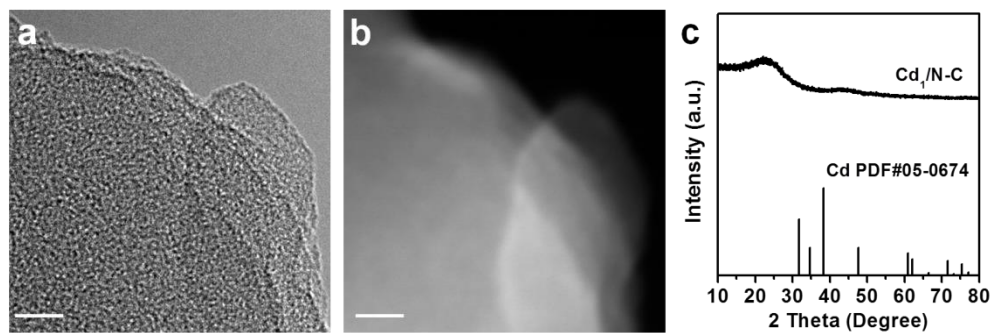

**Supplementary Fig. 21** **a** TEM image, **b** STEM image, and **c** XRD pattern of Cd<sub>1</sub>/N-C. Scale bar, 10 nm.

**Supplementary Table 19.** Cd content, N content, BET surface area for Cd<sub>1</sub>/N-C

| Cd (wt%) <sup>a</sup> | N (wt%) <sup>b</sup> | BET surface area (m <sup>2</sup> g <sup>-1</sup> ) <sup>c</sup> |
|-----------------------|----------------------|-----------------------------------------------------------------|
| 0.32                  | 4.59                 | 629                                                             |

<sup>a</sup> ICP-OES. <sup>b</sup> EA. <sup>c</sup> Sorption isotherm of N<sub>2</sub> at 77 K.

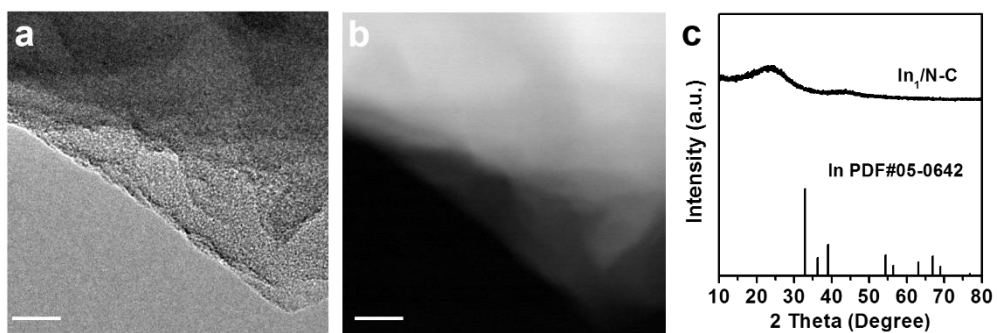

**Supplementary Fig. 22** **a** TEM image, **b** STEM image, and **c** XRD pattern of  $\text{In}_1/\text{N-C}$ .

Scale bar, 10 nm.

**Supplementary Table 20.** In content, N content, BET surface area for  $\text{In}_1/\text{N-C}$

| In (wt%) <sup>a</sup> | N (wt%) <sup>b</sup> | BET surface area ( $\text{m}^2\text{g}^{-1}$ ) <sup>c</sup> |
|-----------------------|----------------------|-------------------------------------------------------------|
| 0.09                  | 4.57                 | 683                                                         |

<sup>a</sup> ICP-OES. <sup>b</sup> EA. <sup>c</sup> Sorption isotherm of  $\text{N}_2$  at 77 K.

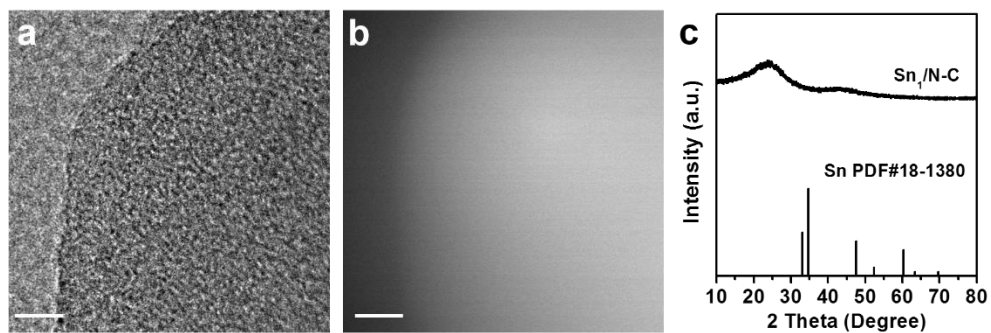

**Supplementary Fig. 23** **a** TEM image, **b** STEM image, and **c** XRD pattern of Sn<sub>1</sub>/N-C. Scale bar, 10 nm.

**Supplementary Table 21.** Sn content, N content, BET surface area for Sn<sub>1</sub>/N-C

| Sn (wt%) <sup>a</sup> | N (wt%) <sup>b</sup> | BET surface area (m <sup>2</sup> g <sup>-1</sup> ) <sup>c</sup> |
|-----------------------|----------------------|-----------------------------------------------------------------|
| 0.43                  | 4.54                 | 426                                                             |

<sup>a</sup> ICP-OES. <sup>b</sup> EA. <sup>c</sup> Sorption isotherm of N<sub>2</sub> at 77 K.

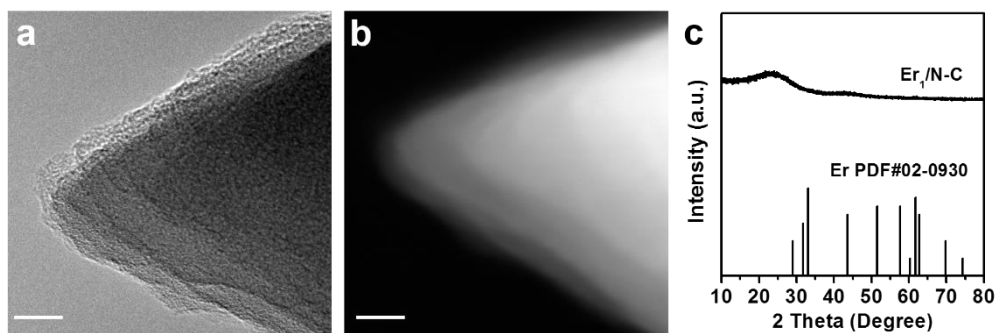

**Supplementary Fig. 24** **a** TEM image, **b** STEM image, and **c** XRD pattern of Er<sub>1</sub>/N-C. Scale bar, 10 nm.

**Supplementary Table 22.** Er content, N content, BET surface area for Er<sub>1</sub>/N-C

| Er (wt%) <sup>a</sup> | N (wt%) <sup>b</sup> | BET surface area (m <sup>2</sup> g <sup>-1</sup> ) <sup>c</sup> |
|-----------------------|----------------------|-----------------------------------------------------------------|
| 0.06                  | 4.68                 | 793                                                             |

<sup>a</sup> ICP-OES. <sup>b</sup> EA. <sup>c</sup> Sorption isotherm of N<sub>2</sub> at 77 K.



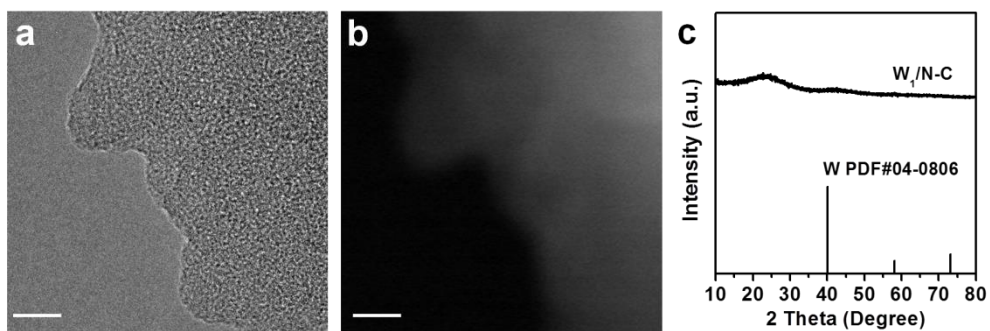

**Supplementary Fig. 25** a TEM image, b STEM image, and c XRD pattern of W<sub>1</sub>/N-C. Scale bar, 10 nm.

**Supplementary Table 23.** W content, N content, BET surface area for W<sub>1</sub>/N-C

| W (wt%) <sup>a</sup> | N (wt%) <sup>b</sup> | BET surface area (m <sup>2</sup> g <sup>-1</sup> ) <sup>c</sup> |
|----------------------|----------------------|-----------------------------------------------------------------|
| 0.27                 | 5.34                 | 443                                                             |

<sup>a</sup> ICP-OES. <sup>b</sup> EA. <sup>c</sup> Sorption isotherm of N<sub>2</sub> at 77 K.

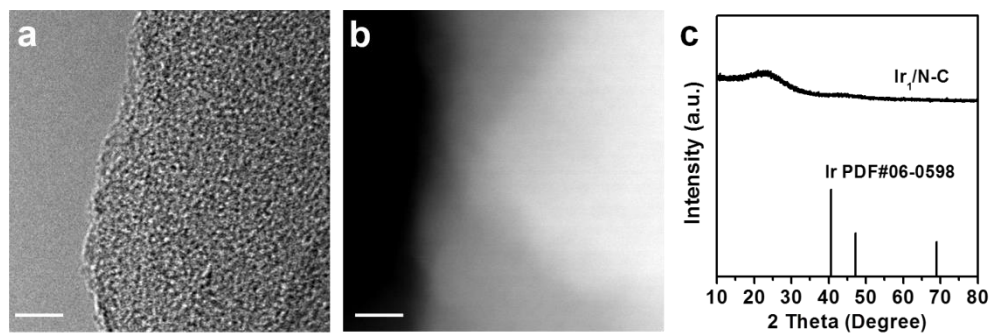

**Supplementary Fig. 26** **a** TEM image, **b** STEM image, and **c** XRD pattern of Ir<sub>1</sub>/N-C.

Scale bar, 10 nm.

**Supplementary Table 24.** Ir content, N content, BET surface area for Ir<sub>1</sub>/N-C

| Ir (wt%) <sup>a</sup> | N (wt%) <sup>b</sup> | BET surface area (m <sup>2</sup> g <sup>-1</sup> ) <sup>c</sup> |
|-----------------------|----------------------|-----------------------------------------------------------------|
| 0.38                  | 5.02                 | 837                                                             |

<sup>a</sup> ICP-OES. <sup>b</sup> EA. <sup>c</sup> Sorption isotherm of N<sub>2</sub> at 77 K.

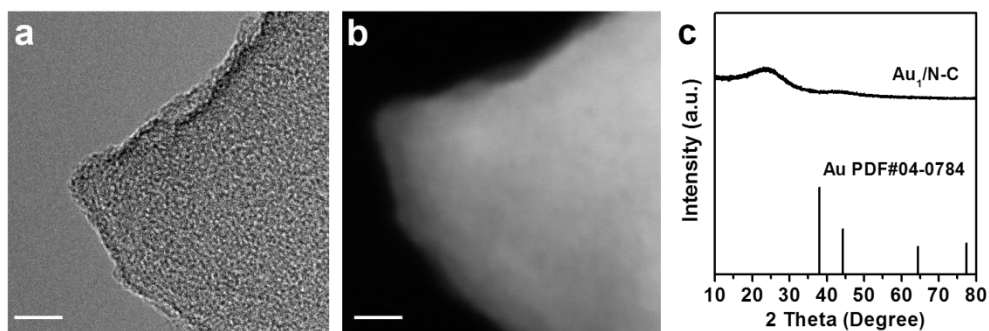

**Supplementary Fig. 27** a TEM image, b STEM image, and c XRD pattern of Au<sub>1</sub>/N-C. Scale bar, 10 nm.

**Supplementary Table 25.** Au content, N content, BET surface area for Au<sub>1</sub>/N-C

| Au (wt%) <sup>a</sup> | N (wt%) <sup>b</sup> | BET surface area (m <sup>2</sup> g <sup>-1</sup> ) <sup>c</sup> |
|-----------------------|----------------------|-----------------------------------------------------------------|
| 0.19                  | 5.02                 | 783                                                             |

<sup>a</sup> ICP-OES. <sup>b</sup> EA. <sup>c</sup> Sorption isotherm of N<sub>2</sub> at 77 K.

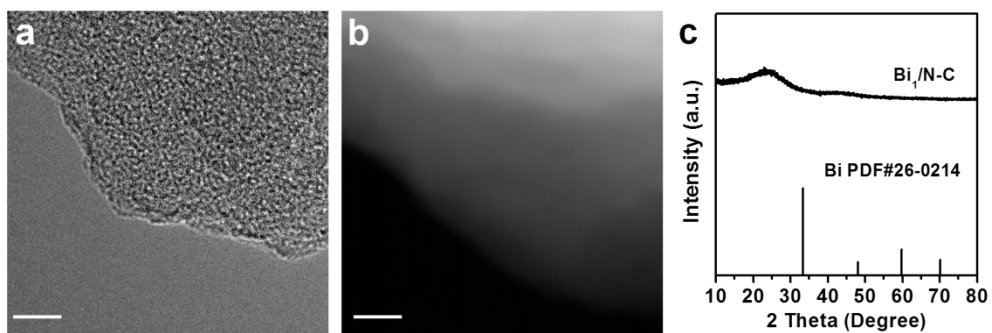

**Supplementary Fig. 28** **a** TEM image, **b** STEM image, and **c** XRD pattern of Bi<sub>1</sub>/N-C. Scale bar, 10 nm.

**Supplementary Table 26.** Bi content, N content, BET surface area for Bi<sub>1</sub>/N-C

| Bi (wt%) <sup>a</sup> | N (wt%) <sup>b</sup> | BET surface area (m <sup>2</sup> g <sup>-1</sup> ) <sup>c</sup> |
|-----------------------|----------------------|-----------------------------------------------------------------|
| 0.08                  | 5.19                 | 743                                                             |

<sup>a</sup> ICP-OES. <sup>b</sup> EA. <sup>c</sup> Sorption isotherm of N<sub>2</sub> at 77 K.

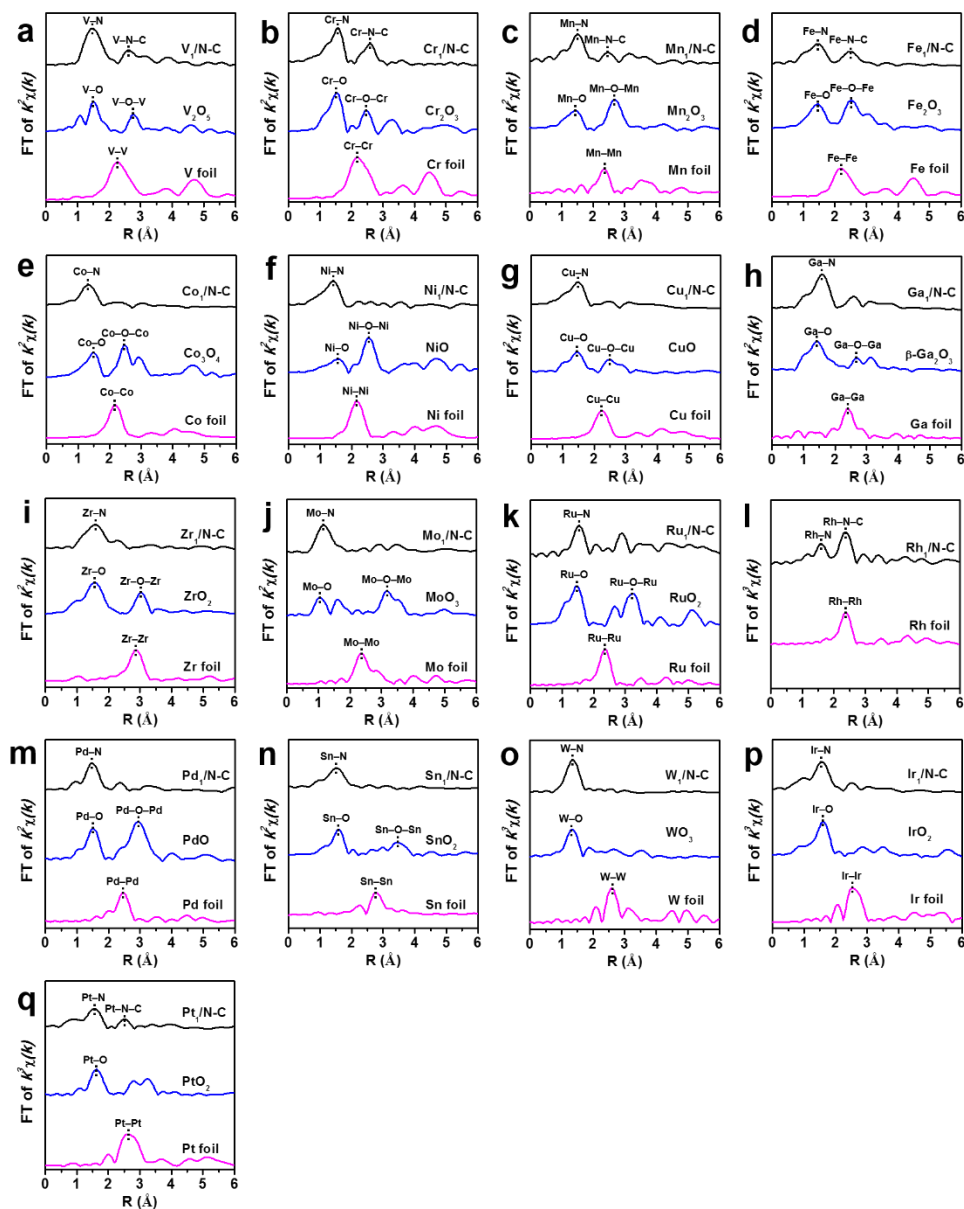

**Supplementary Fig. 29** EXAFS data for  $M_1/N-C$ , corresponding metal oxides and metal foils ( $M = V, Cr, Mn, Fe, Co, Ni, Cu, Ga, Zr, Mo, Ru, Rh, Pd, Sn, W, Ir,$  and  $Pt$ , respectively).

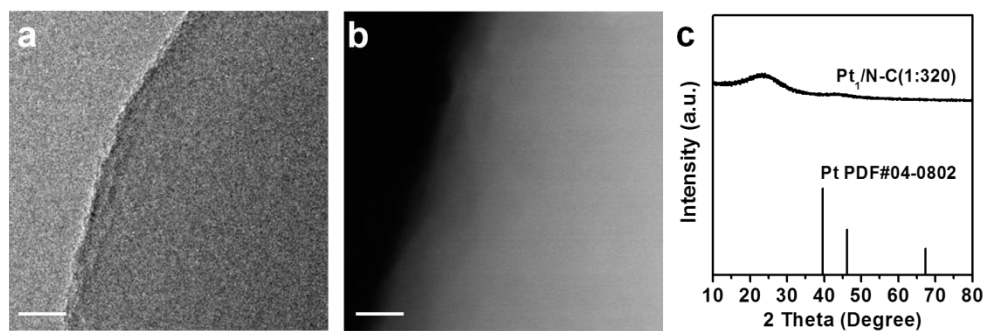

**Supplementary Fig. 30** **a** TEM image, **b** STEM image and **c** XRD pattern of Pt<sub>1</sub>/N-C(1:320). Scale bar, 10 nm.

**Supplementary Table 27.** Pt content, N content, BET surface area for Pt<sub>1</sub>/N-C(1:320)

| Pt (wt%) <sup>a</sup> | N (wt%) <sup>b</sup> | BET surface area (m <sup>2</sup> g <sup>-1</sup> ) <sup>c</sup> |
|-----------------------|----------------------|-----------------------------------------------------------------|
| 0.06                  | 4.83                 | 644                                                             |

<sup>a</sup> ICP-OES. <sup>b</sup> EA. <sup>c</sup> Sorption isotherm of N<sub>2</sub> at 77 K.

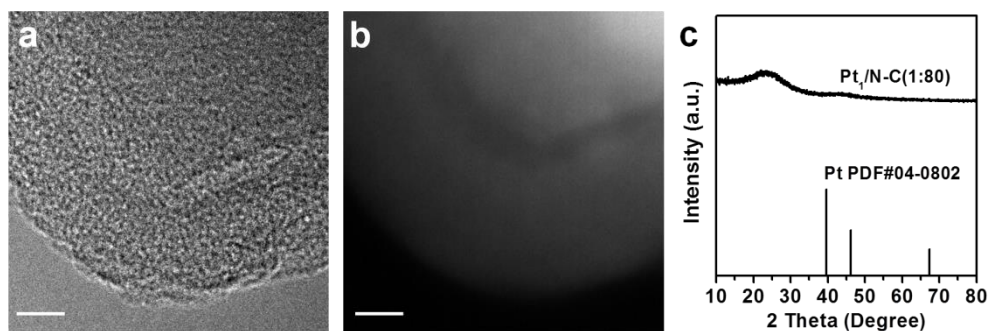

**Supplementary Fig. 31** **a** TEM image, **b** STEM image and **c** XRD pattern of Pt<sub>1</sub>/N-C(1:80). Scale bar, 10 nm.

**Supplementary Table 28.** Pt content, N content, BET surface area for Pt<sub>1</sub>/N-C(1:80)

| Pt (wt%) <sup>a</sup> | N (wt%) <sup>b</sup> | BET surface area (m <sup>2</sup> g <sup>-1</sup> ) <sup>c</sup> |
|-----------------------|----------------------|-----------------------------------------------------------------|
| 0.21                  | 4.66                 | 632                                                             |

<sup>a</sup> ICP-OES. <sup>b</sup> EA. <sup>c</sup> Sorption isotherm of N<sub>2</sub> at 77 K.

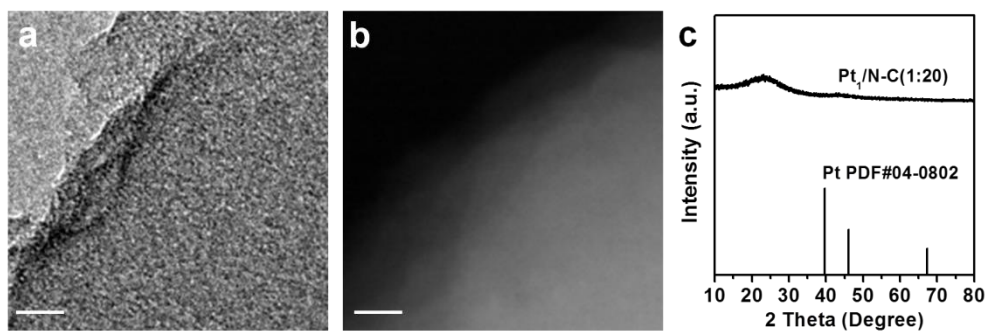

**Supplementary Fig. 32** **a** TEM image, **b** STEM image and **c** XRD pattern of Pt<sub>1</sub>/N-C(1:20). Scale bar, 10 nm.

**Supplementary Table 29.** Pt content, N content, BET surface area for Pt<sub>1</sub>/N-C(1:20)

| Pt (wt%) <sup>a</sup> | N (wt%) <sup>b</sup> | BET surface area (m <sup>2</sup> g <sup>-1</sup> ) <sup>c</sup> |
|-----------------------|----------------------|-----------------------------------------------------------------|
| 0.73                  | 4.85                 | 656                                                             |

<sup>a</sup> ICP-OES. <sup>b</sup> EA. <sup>c</sup> Sorption isotherm of N<sub>2</sub> at 77 K.



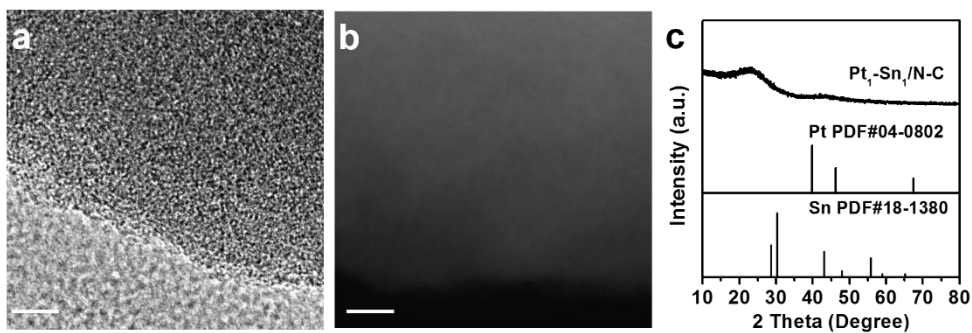

**Supplementary Fig. 33** a TEM image, b STEM image and c XRD pattern of Pt<sub>1</sub>-Sn<sub>1</sub>/N-C. Scale bar, 10 nm.

**Supplementary Table 30.** Pt, Sn, and N content, BET surface area for Pt<sub>1</sub>-Sn<sub>1</sub>/N-C

| Pt (wt%) <sup>a</sup> | Sn (wt%) <sup>a</sup> | N (wt%) <sup>b</sup> | BET surface area (m <sup>2</sup> g <sup>-1</sup> ) <sup>c</sup> |
|-----------------------|-----------------------|----------------------|-----------------------------------------------------------------|
| 0.48                  | 0.35                  | 5.19                 | 724                                                             |

<sup>a</sup> ICP-OES. <sup>b</sup> EA. <sup>c</sup> Sorption isotherm of N<sub>2</sub> at 77 K.

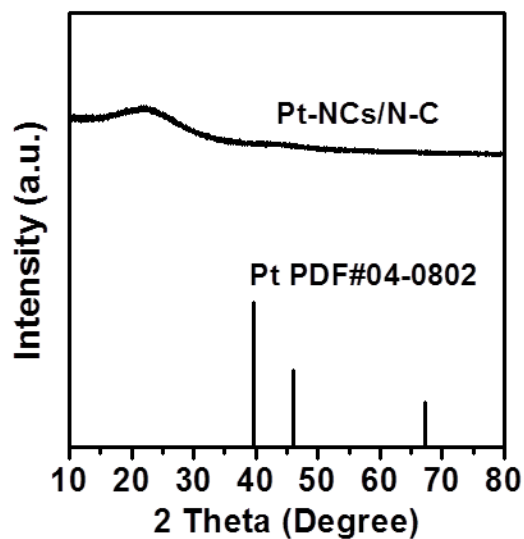

**Supplementary Fig. 34** XRD pattern of Pt-NCs/N-C.

**Supplementary Table 31.** Pt content, N content, BET surface area for Pt-NCs/N-C

| Pt (wt%) <sup>a</sup> | N (wt%) <sup>b</sup> | BET surface area (m <sup>2</sup> g <sup>-1</sup> ) <sup>c</sup> |
|-----------------------|----------------------|-----------------------------------------------------------------|
| 0.47                  | 4.82                 | 581                                                             |

<sup>a</sup> ICP-OES. <sup>b</sup> EA. <sup>c</sup> Sorption isotherm of N<sub>2</sub> at 77 K.

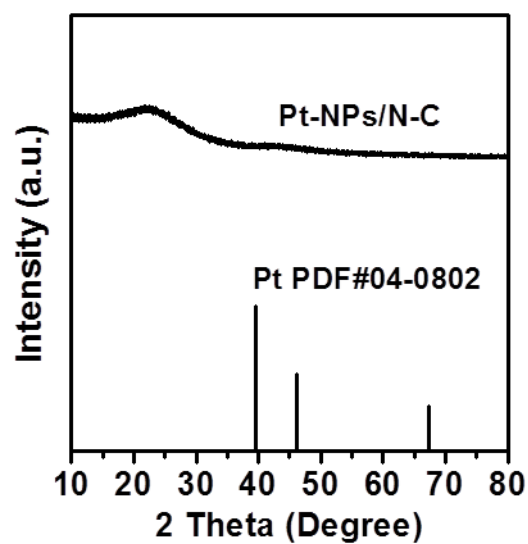

**Supplementary Fig. 35** XRD pattern of Pt-NPs/N-C.

**Supplementary Table 32.** Pt content, N content, BET surface area for Pt-NPs/N-C

| Pt (wt%) <sup>a</sup> | N (wt%) <sup>b</sup> | BET surface area (m <sup>2</sup> g <sup>-1</sup> ) <sup>c</sup> |
|-----------------------|----------------------|-----------------------------------------------------------------|
| 0.52                  | 4.51                 | 566                                                             |

<sup>a</sup> ICP-OES. <sup>b</sup> EA. <sup>c</sup> Sorption isotherm of N<sub>2</sub> at 77 K.

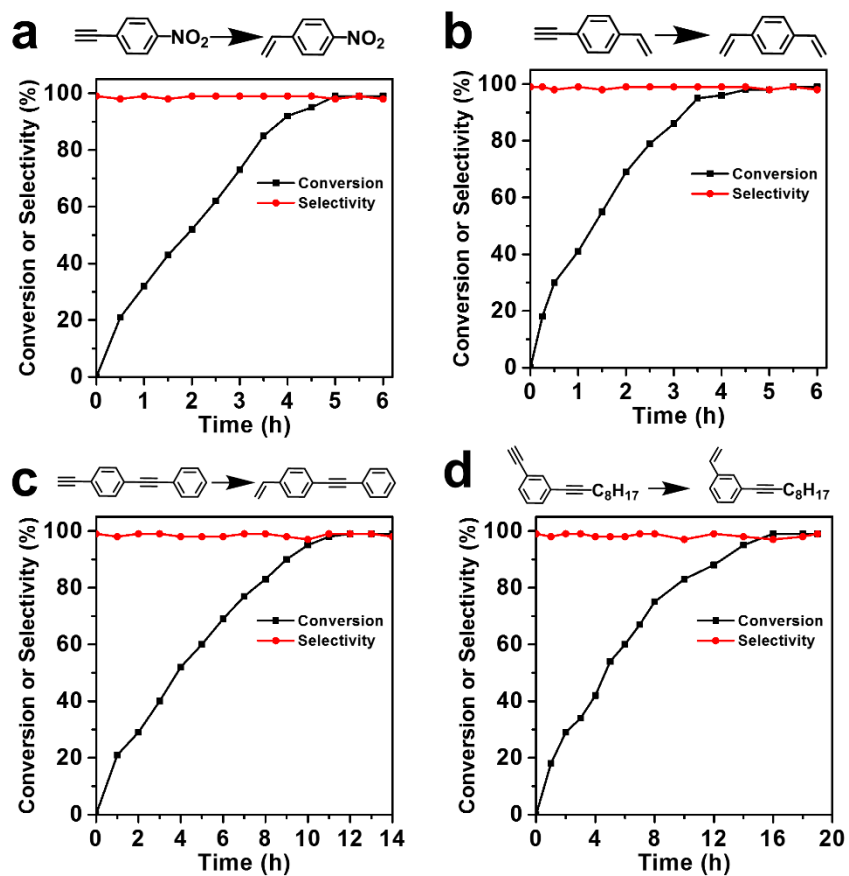

**Supplementary Fig. 36** Selective hydrogenation of **a** 1-nitro-4-ethynylbenzene, **b** 1-ethynyl-4-vinylbenzene, **c** 1-ethynyl-4-(phenylethynyl)benzene, and **d** 1-(dec-1-yn-1-yl)-3-ethynylbenzene on Pt<sub>1</sub>/N-C. Reaction condition: substrate (0.5 mmol), Pt<sub>1</sub>/N-C (Pt:substrate = 1:1200, mol:mol), methanol (2.0 mL), H<sub>2</sub> (1.0 MPa). Reaction temperature: **a** and **b** 50 °C; **c** and **d** 80 °C.

**Supplementary Table 33.** Hydrogenation of substrates with internal alkyne on Pt catalysts with different aggregation states <sup>a</sup>

| Entry          | Substrate                                                                         | Product                                                                           | Pt <sub>1</sub> /N-C   |          | Pt-NCs/N-C             |          | Pt-NPs/N-C             |          |
|----------------|-----------------------------------------------------------------------------------|-----------------------------------------------------------------------------------|------------------------|----------|------------------------|----------|------------------------|----------|
|                |                                                                                   |                                                                                   | Atomically dispersed   |          | 1.1 nm                 |          | 6.9 nm                 |          |
|                |                                                                                   |                                                                                   | TOF (h <sup>-1</sup> ) | Sel. (%) | TOF (h <sup>-1</sup> ) | Sel. (%) | TOF (h <sup>-1</sup> ) | Sel. (%) |
| 1              | 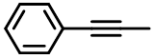 |  | 0                      | —        | 132                    | 86       | 2946                   | 83       |
| 2              |  |  | 0                      | —        | 93                     | 83       | 2556                   | 81       |
| 3 <sup>b</sup> |  |  | 0                      | —        | 2860                   | 76       | 13300                  | 75       |

<sup>a</sup> Substrates (1.0 mmol), catalyst (Pt:substrates = 1:1200, mol:mol), methanol (2.0 mL), 80 °C, H<sub>2</sub> (1.0 MPa). <sup>b</sup> Pt:substrates = 1:4000, mol:mol, 50 °C. All the conversions were maintained at <20%.

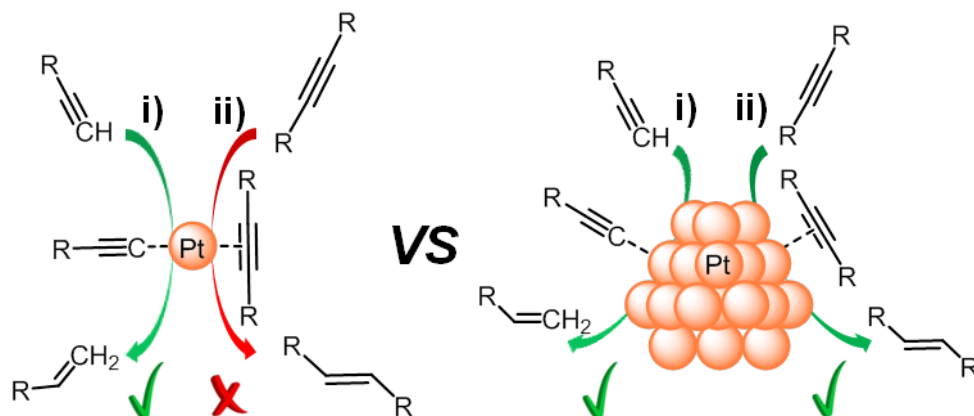

**Supplementary Fig. 37** Schematic illustration of the hydrogenation of substrates with terminal alkyne or internal alkyne on Pt SACs and Pt NPs.

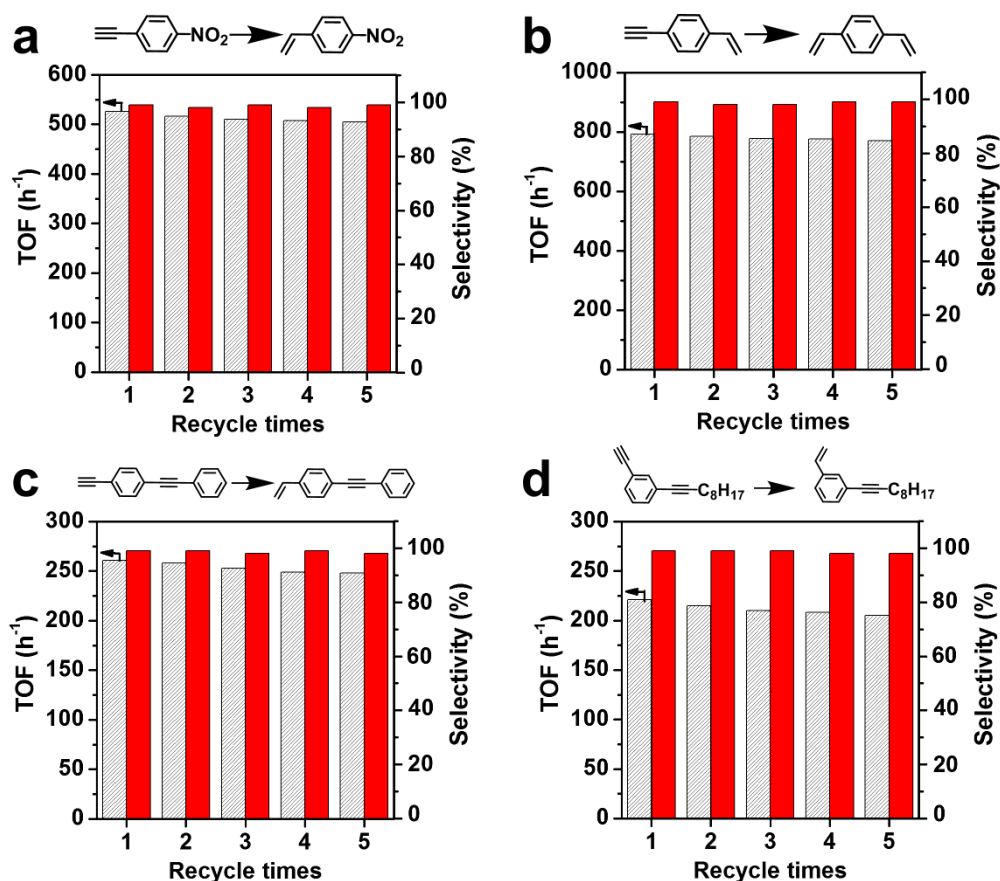

**Supplementary Fig. 38** Catalytic performance of Pt<sub>1</sub>/N-C in hydrogenation of **a** 1-nitro-4-ethynylbenzene, **b** 1-ethynyl-4-vinylbenzene, **c** 1-ethynyl-4-(phenylethynyl)benzene, and **d** 1-(dec-1-yn-1-yl)-3-ethynylbenzene for 5 catalytic runs. Reaction condition: substrate (0.5 mmol), catalyst (Pt:substrate = 1:1200, mol:mol), methanol (2.0 mL), H<sub>2</sub> (1.0 MPa). Reaction temperature: **a** and **b** 50 °C; **c** and **d** 80 °C. All the conversions were maintained at ~20%.

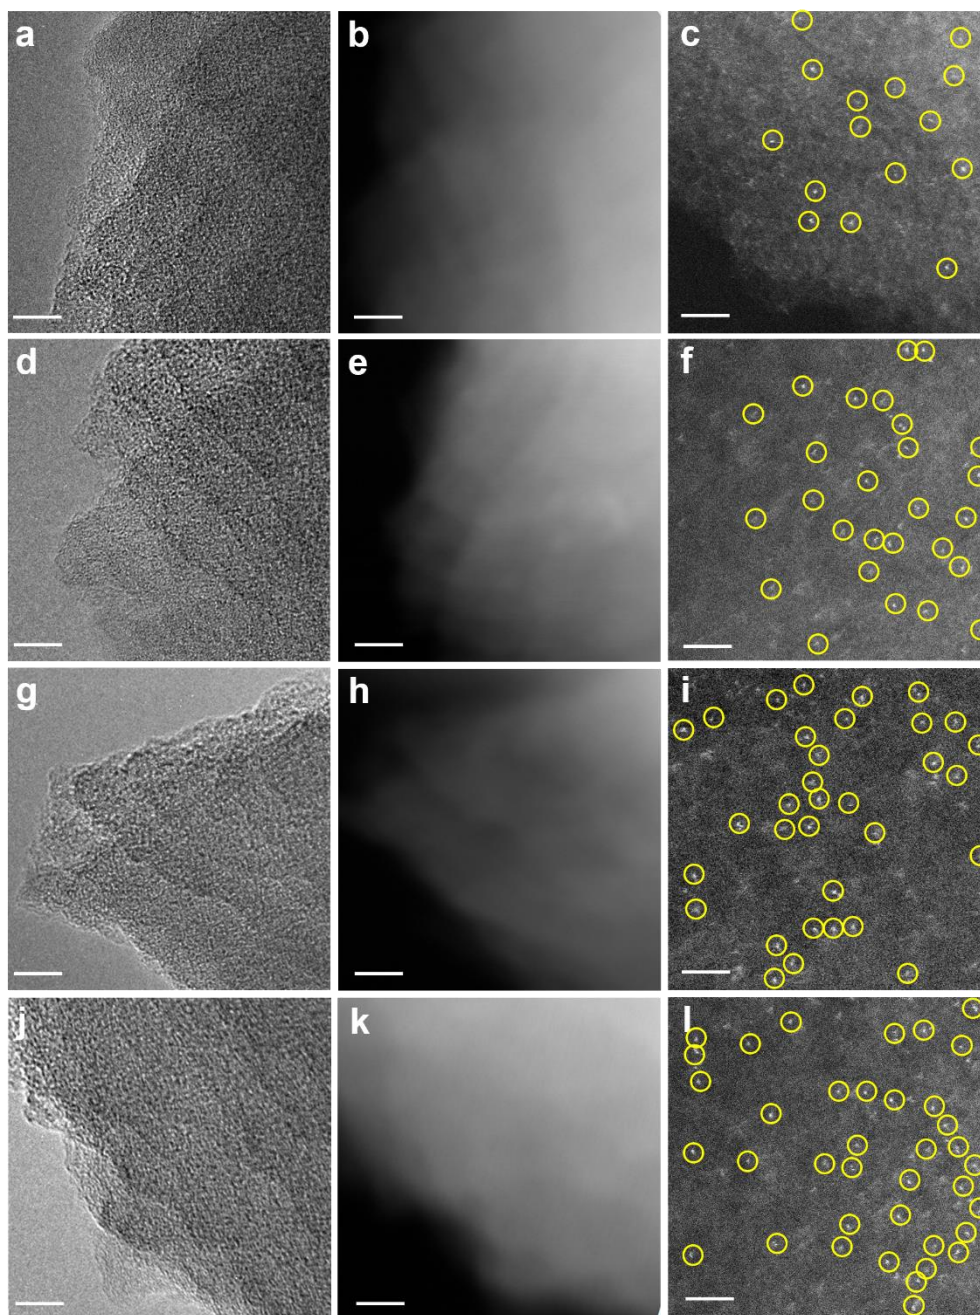

**Supplementary Fig. 39** TEM, STEM, and AC HAADF-STEM images of Pt<sub>1</sub>/N-C after 5 catalytic runs of hydrogenation of **a–c** 1-nitro-4-ethynylbenzene, **d–f** 1-ethynyl-4-vinylbenzene, **g–i** 1-ethynyl-4-(phenylethynyl)benzene, and **j–l** 1-(dec-1-yn-1-yl)-3-ethynylbenzene, respectively. Scale bar, 10 nm for TEM/STEM images, 2 nm for AC HAADF-STEM images.



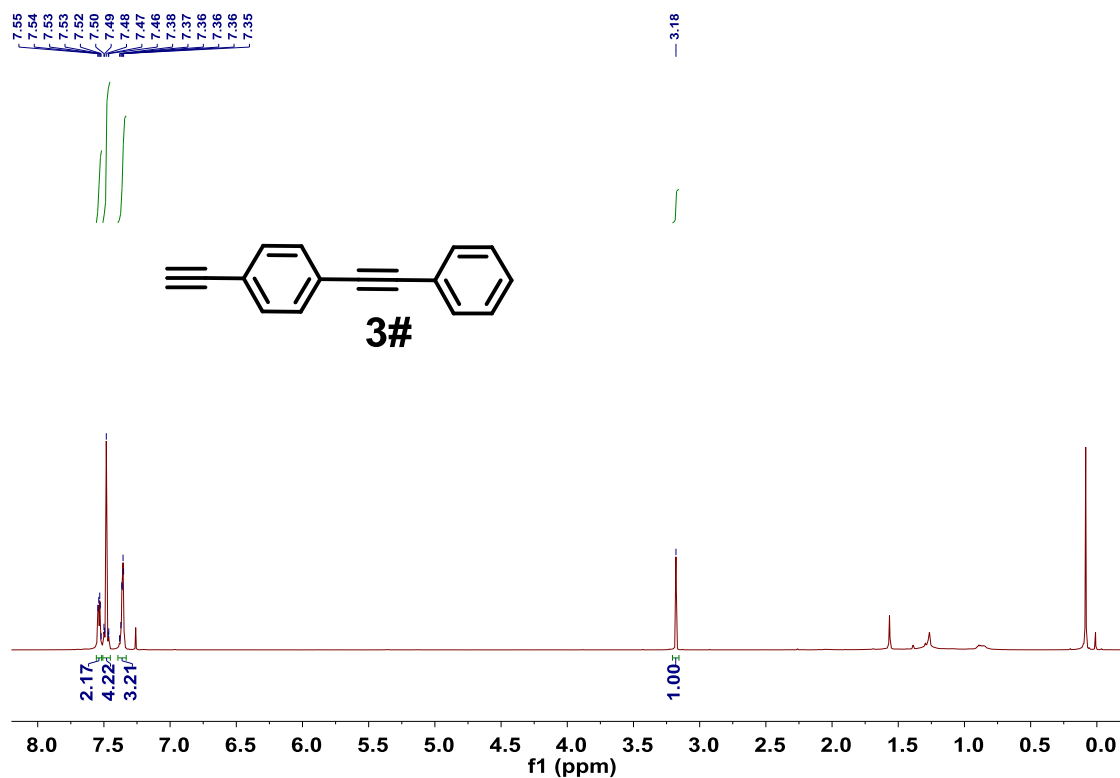

Supplementary Fig. 40 <sup>1</sup>H NMR spectrum of 1-ethynyl-4-(phenylethynyl)benzene.

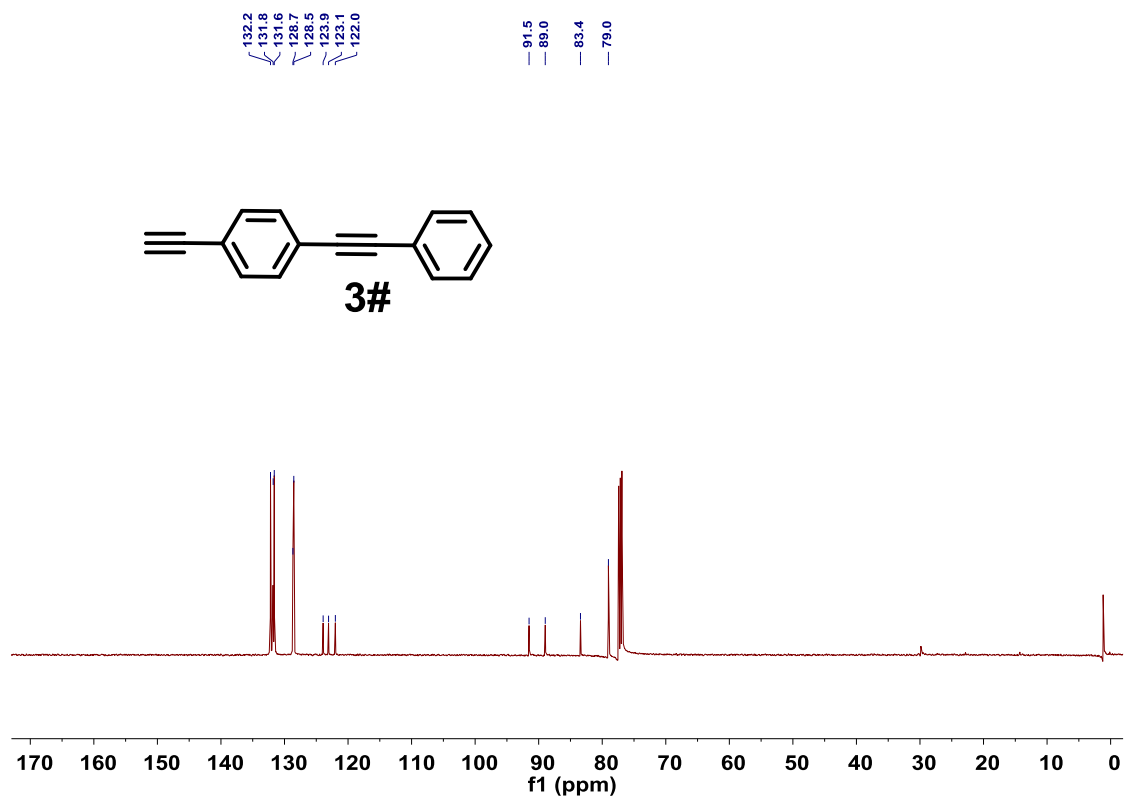

Supplementary Fig. 41 <sup>13</sup>C NMR spectrum of 1-ethynyl-4-(phenylethynyl)benzene.

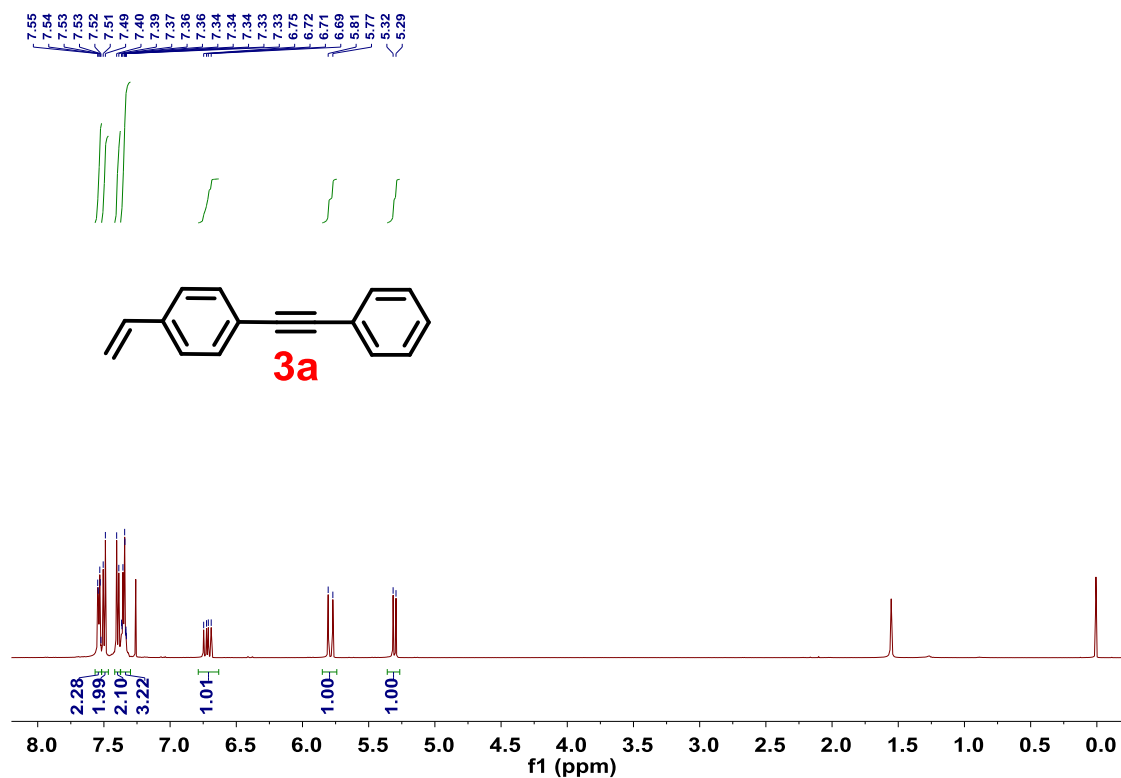

Supplementary Fig. 42 <sup>1</sup>H NMR spectrum of 1-(phenylethynyl)-4-vinylbenzene.

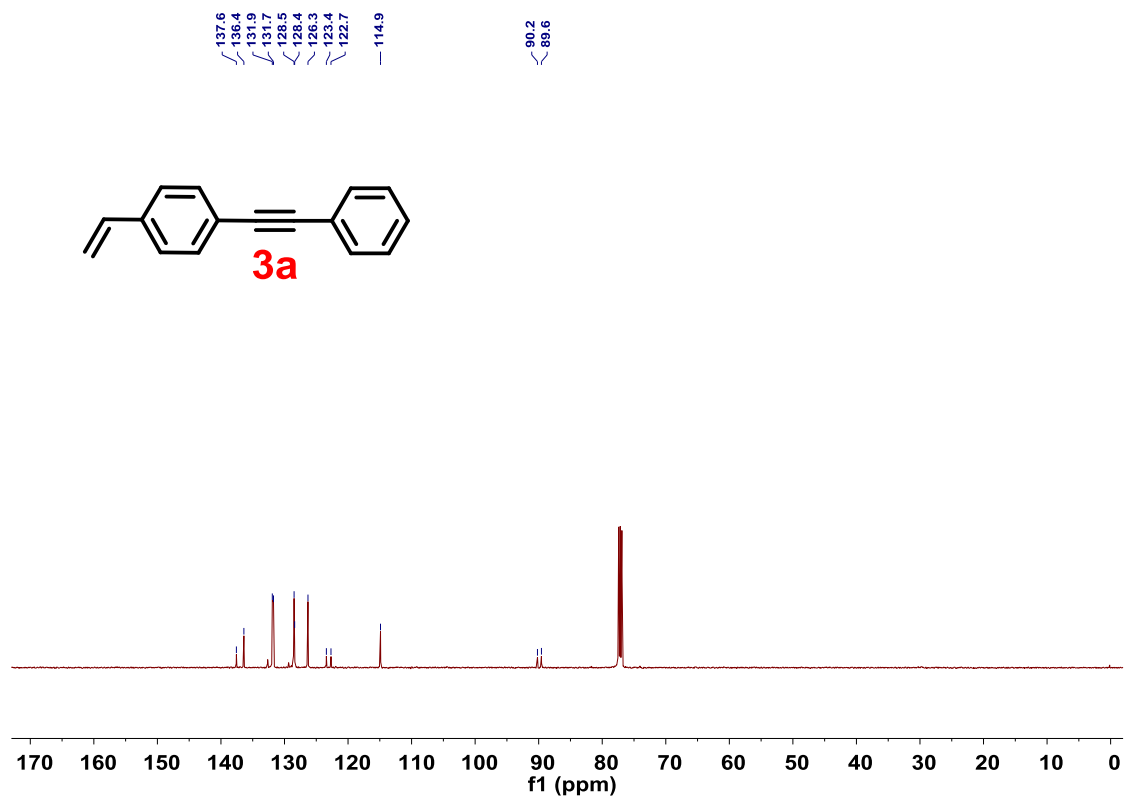

Supplementary Fig. 43 <sup>13</sup>C NMR spectrum of 1-(phenylethynyl)-4-vinylbenzene.

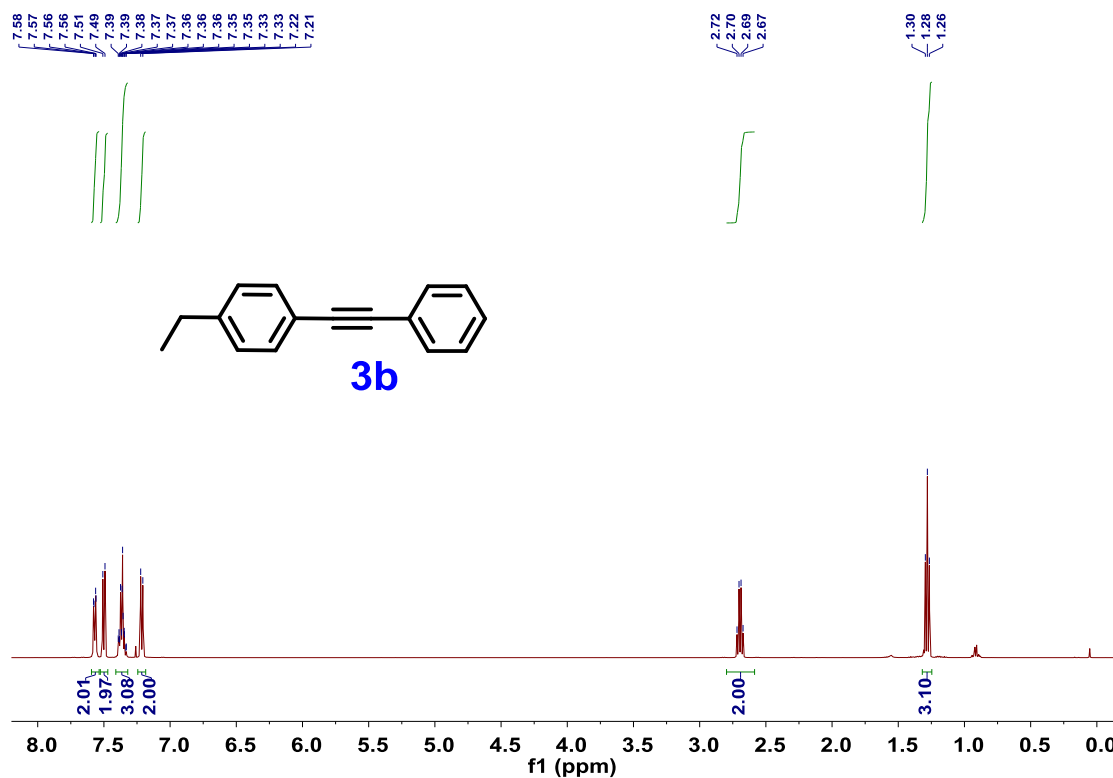

Supplementary Fig. 44 <sup>1</sup>H NMR spectrum of 1-ethyl-4-(phenylethynyl)benzene.

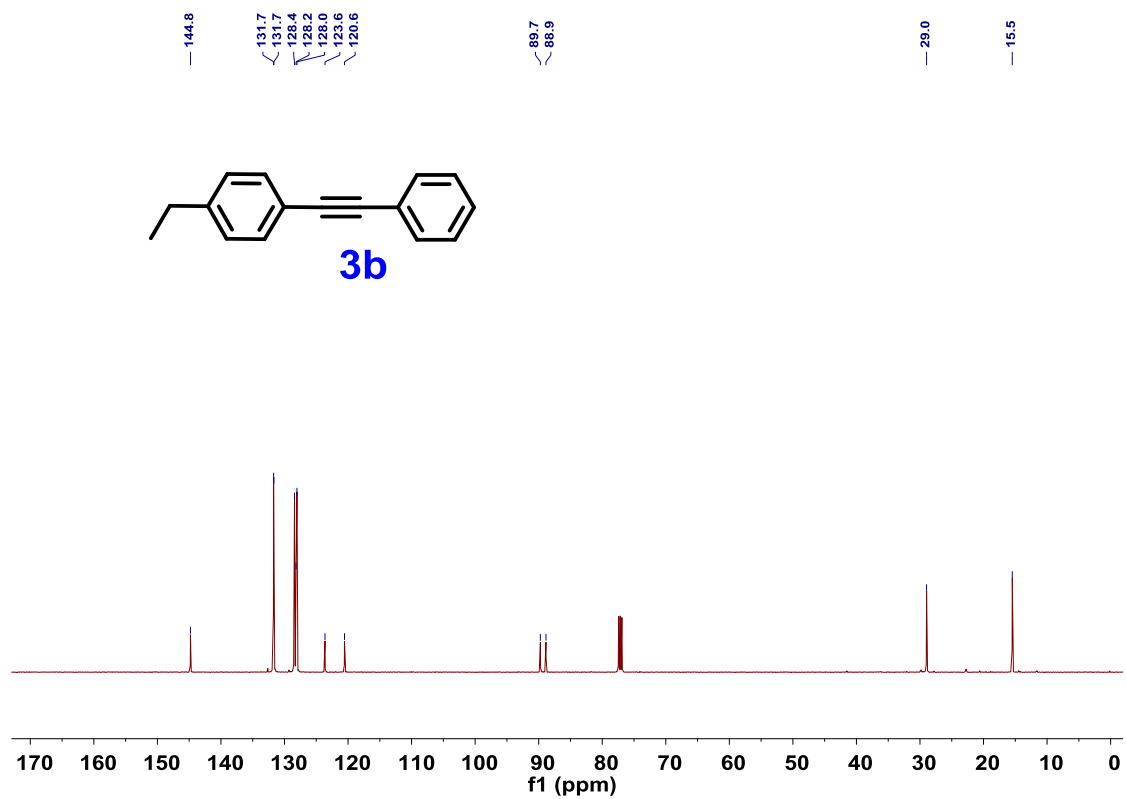

Supplementary Fig. 45 <sup>13</sup>C NMR spectrum of 1-ethyl-4-(phenylethynyl)benzene.

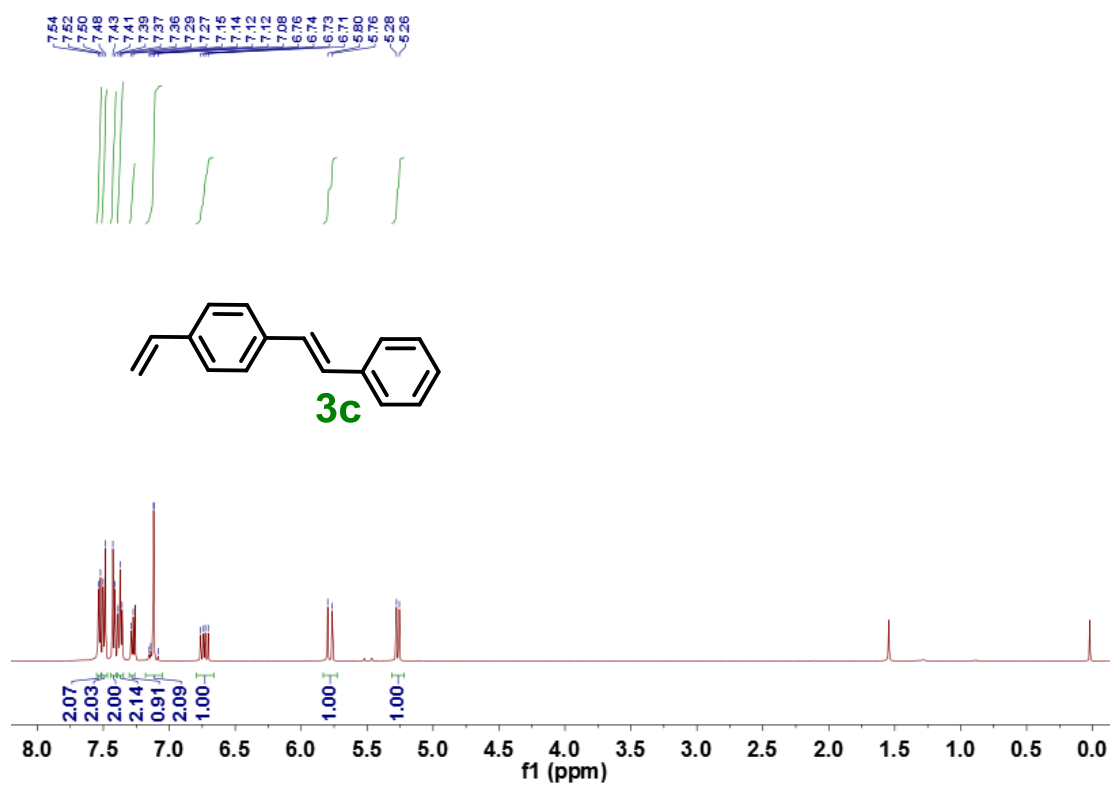

Supplementary Fig. 46 <sup>13</sup>C NMR spectrum of 1-styryl-4-vinylbenzene.

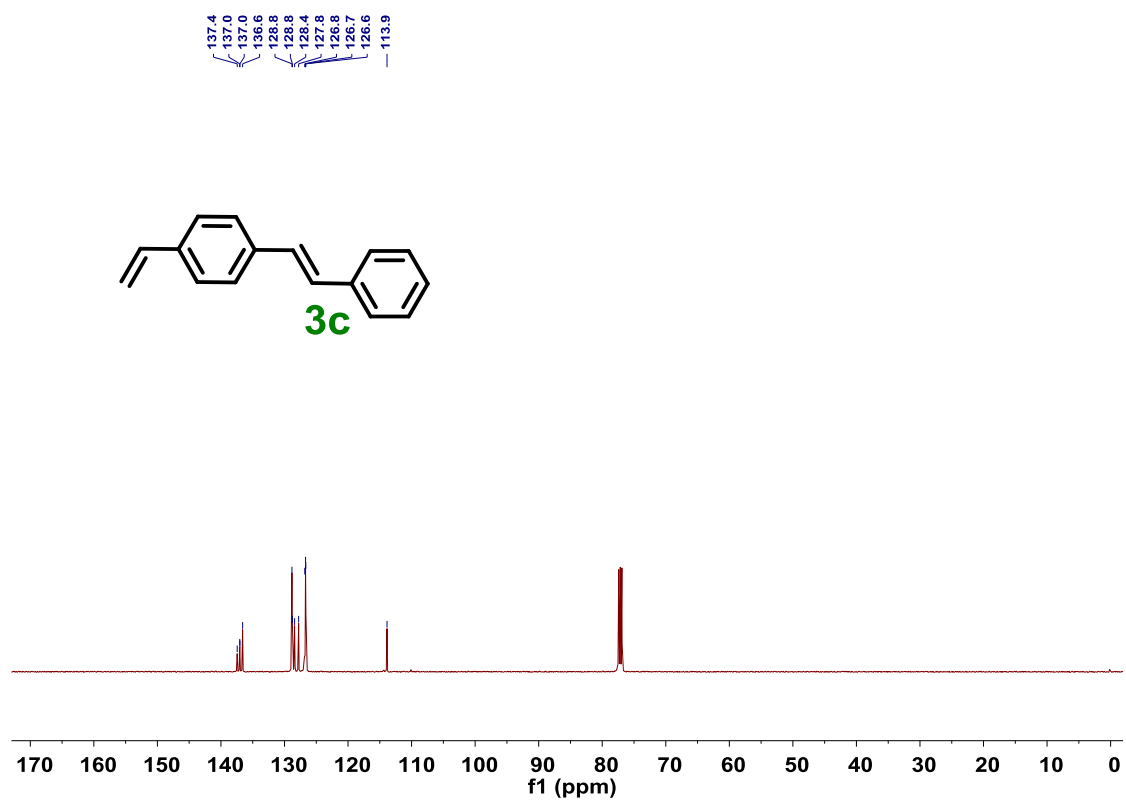

Supplementary Fig. 47 <sup>13</sup>C NMR spectrum of 1-styryl-4-vinylbenzene.

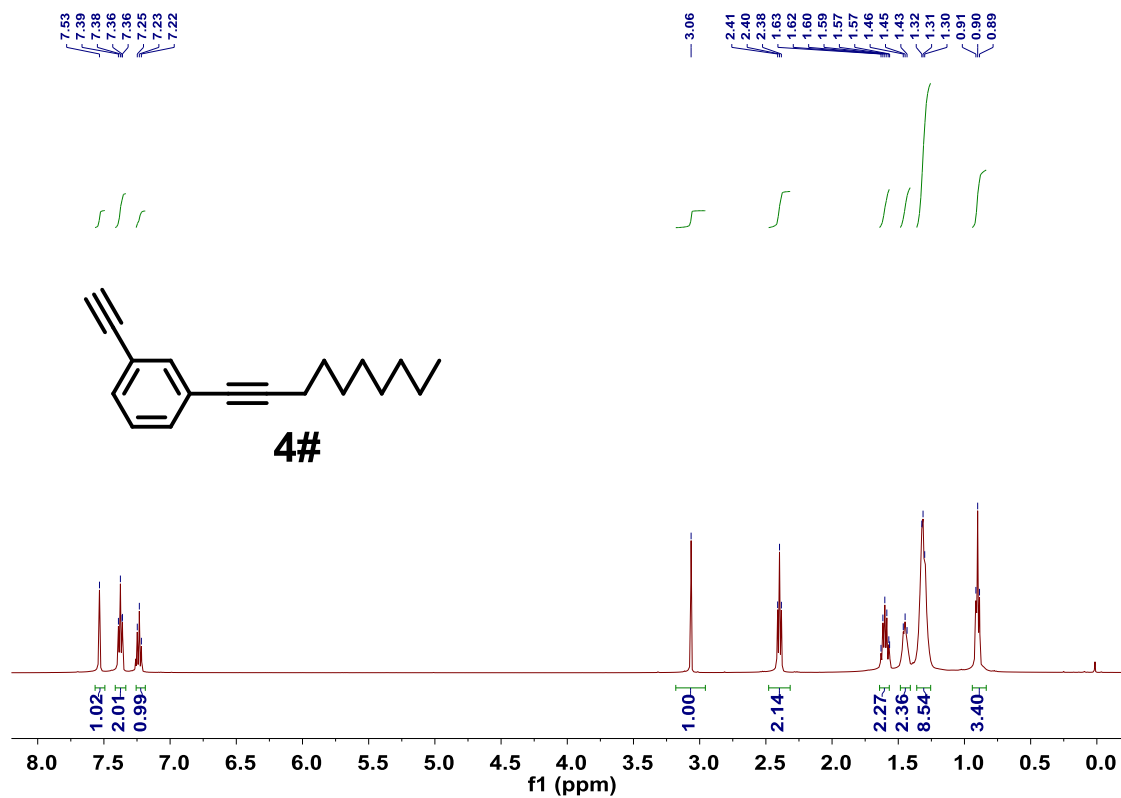

Supplementary Fig. 48 <sup>1</sup>H NMR spectrum of 1-(dec-1-yn-1-yl)-3-ethynylbenzene.

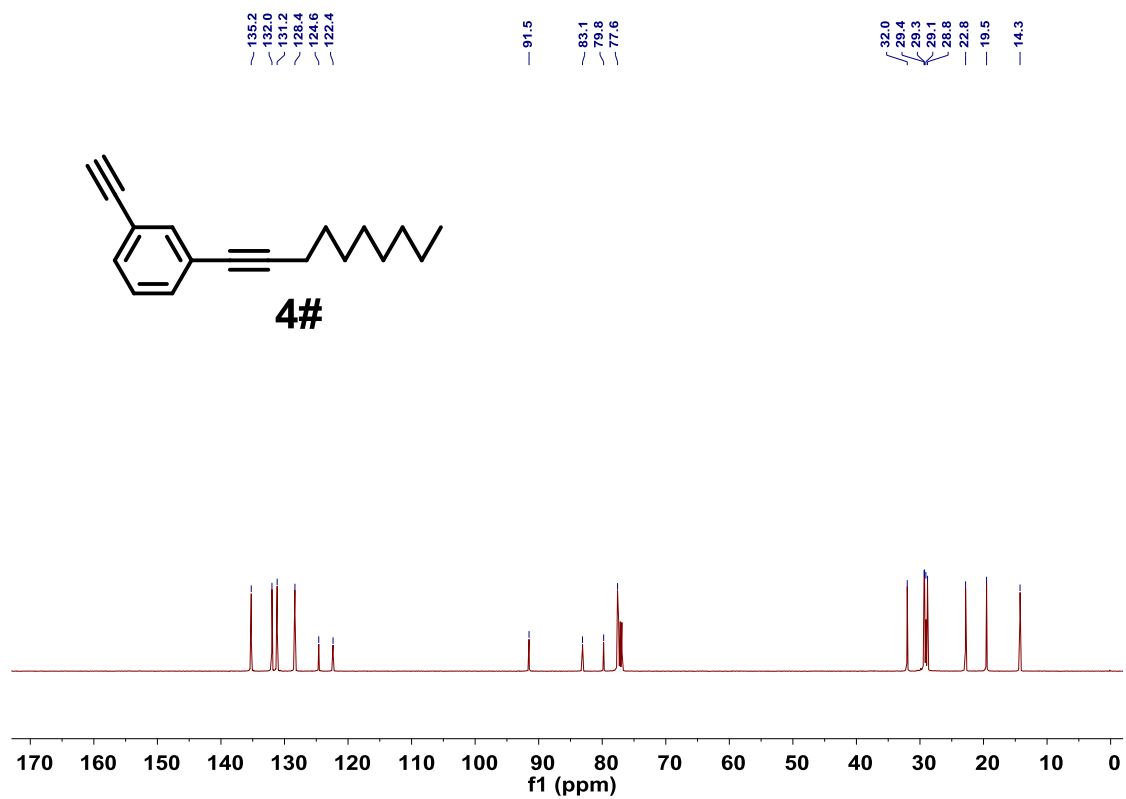

Supplementary Fig. 49 <sup>13</sup>C NMR spectrum of 1-(dec-1-yn-1-yl)-3-ethynylbenzene.

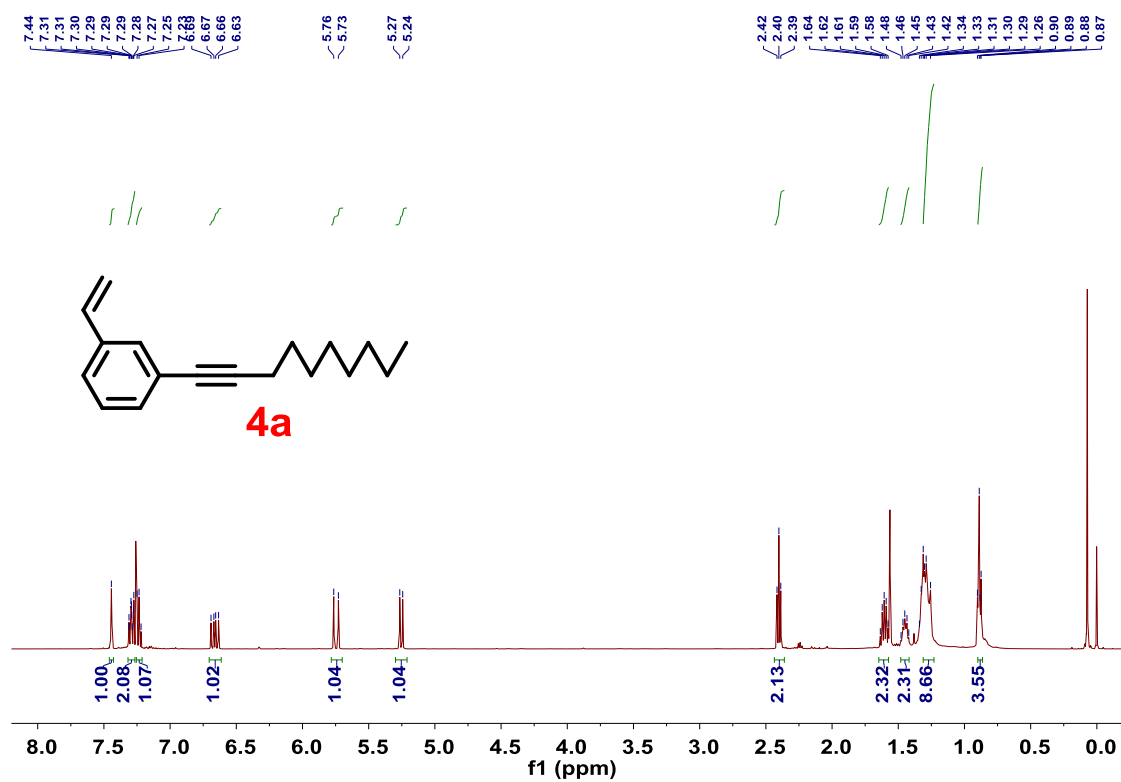

Supplementary Fig. 50 <sup>1</sup>H NMR spectrum of 1-(dec-1-yn-1-yl)-3-vinylbenzene.

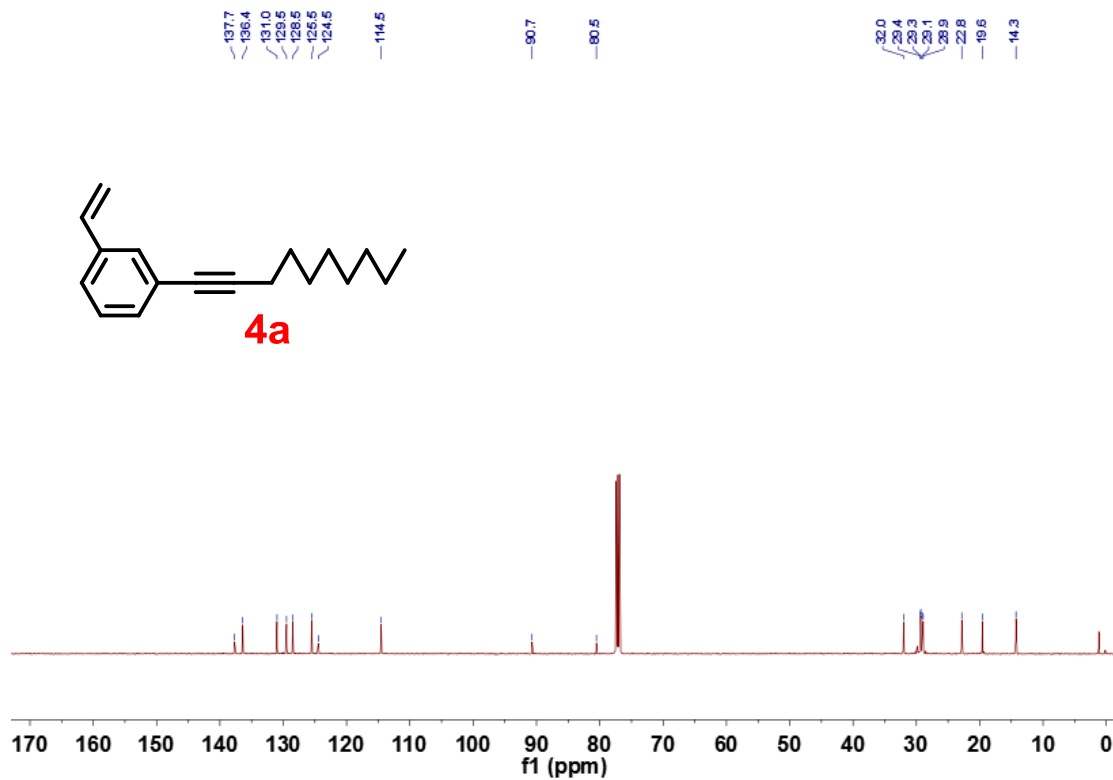

Supplementary Fig. 51 <sup>13</sup>C NMR spectrum of 1-(dec-1-yn-1-yl)-3-vinylbenzene.

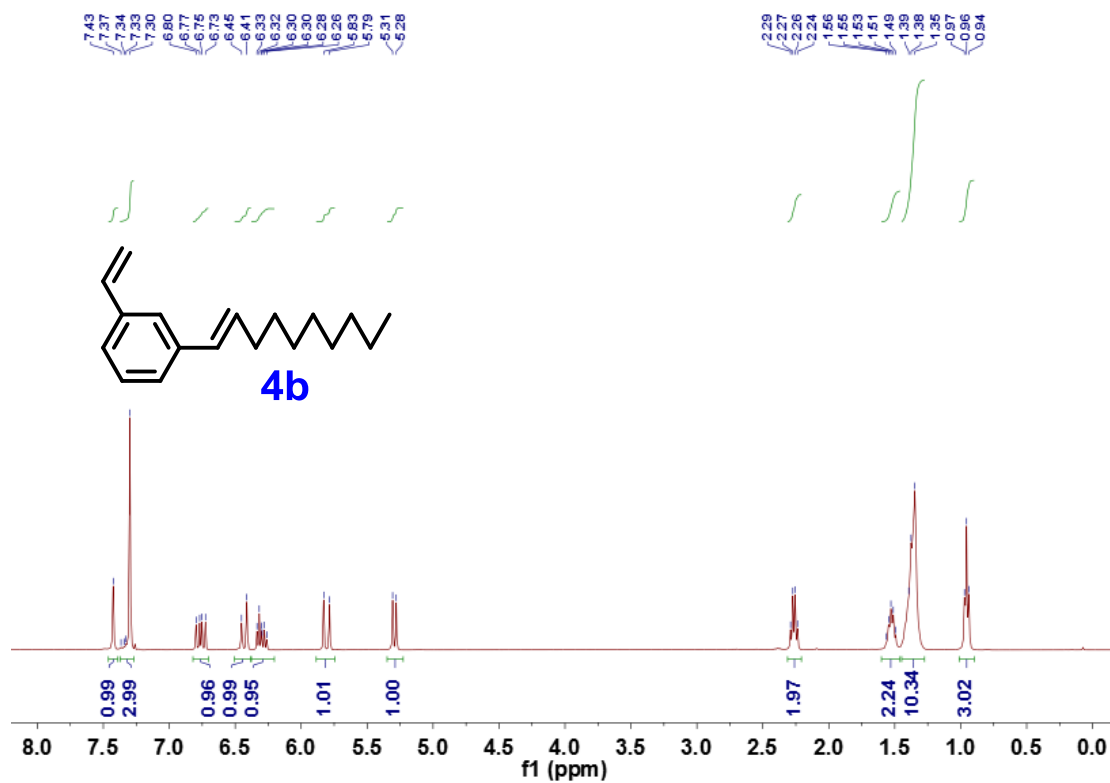

Supplementary Fig. 52 <sup>1</sup>H NMR spectrum of 1-(dec-1-en-1-yl)-3-vinylbenzene.

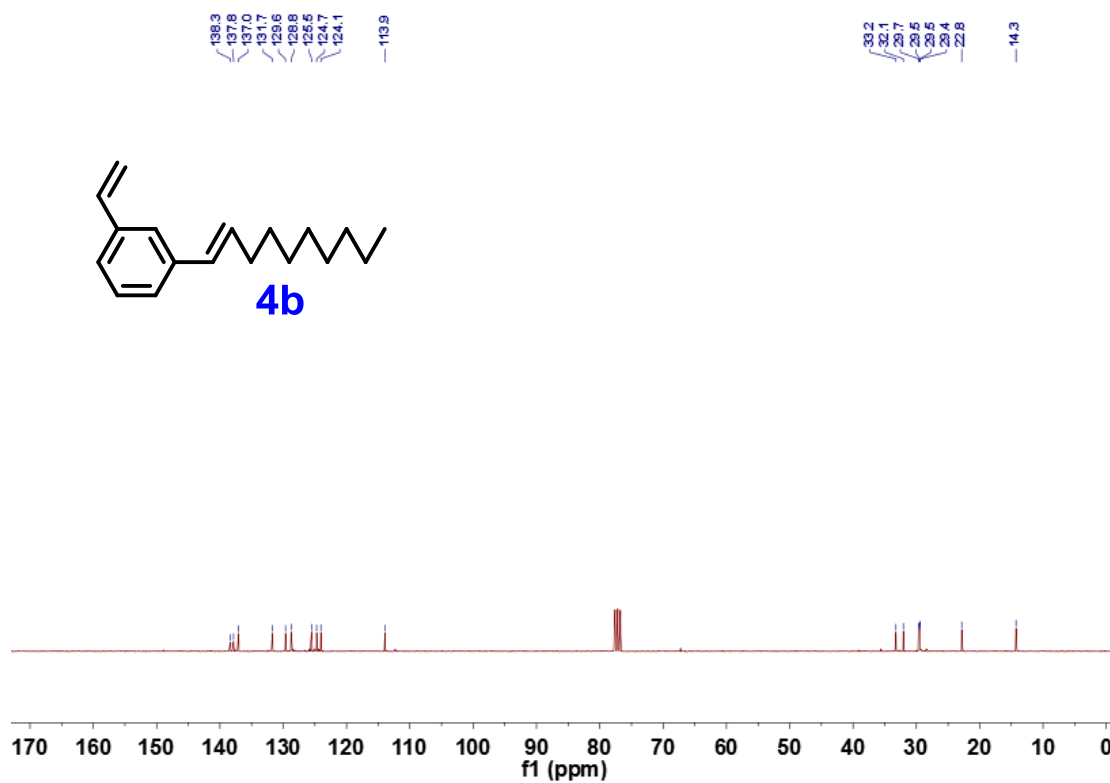

Supplementary Fig. 53 <sup>13</sup>C NMR spectrum of 1-(dec-1-en-1-yl)-3-vinylbenzene.

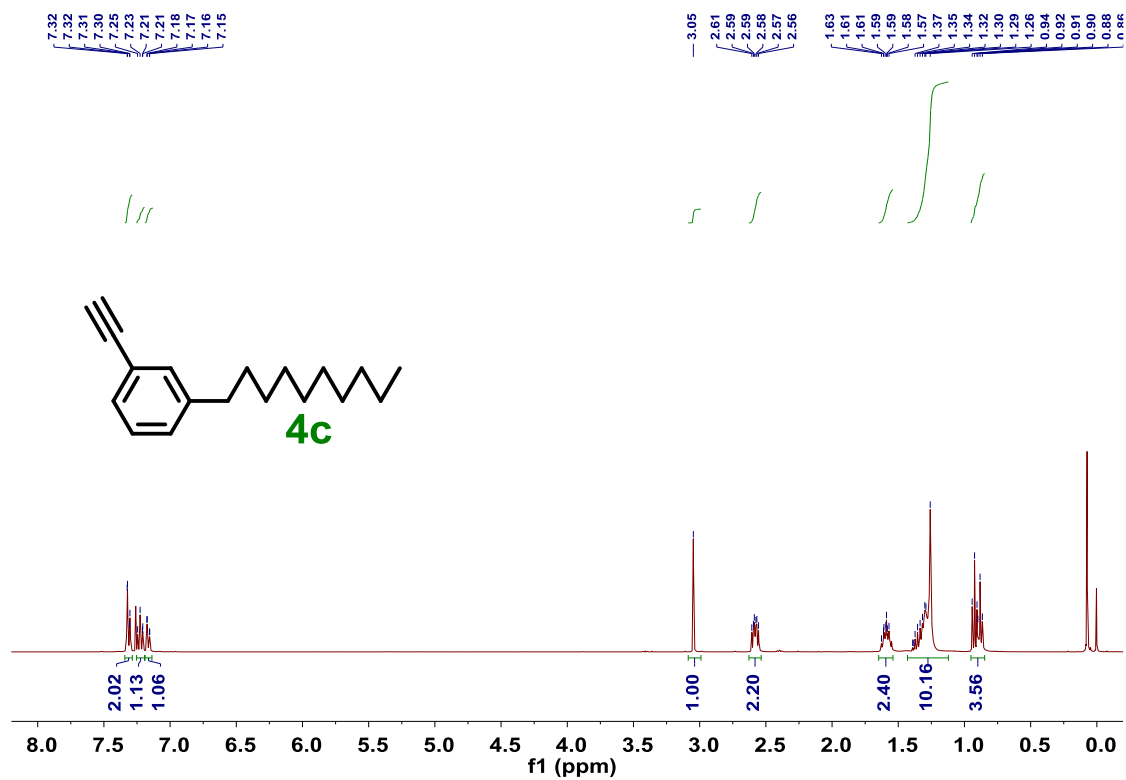

Supplementary Fig. 54 <sup>1</sup>H NMR spectrum of 1-decyl-3-ethynylbenzene.

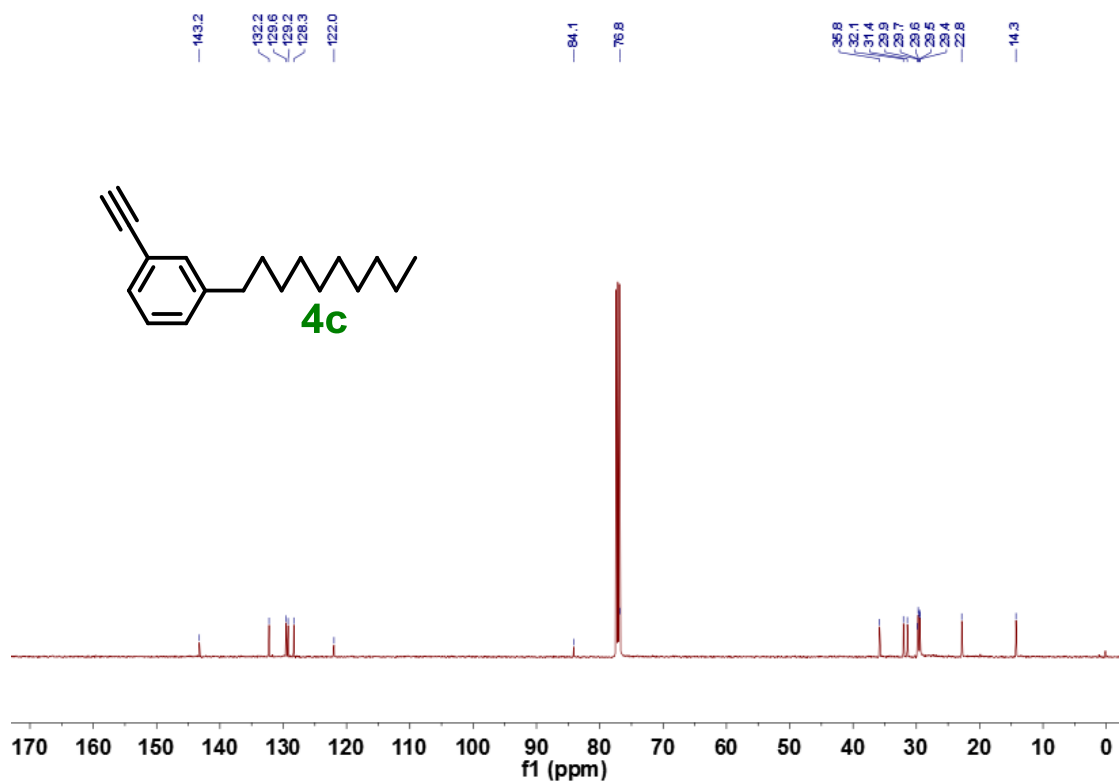

Supplementary Fig. 55 <sup>13</sup>C NMR spectrum of 1-decyl-3-ethynylbenzene.



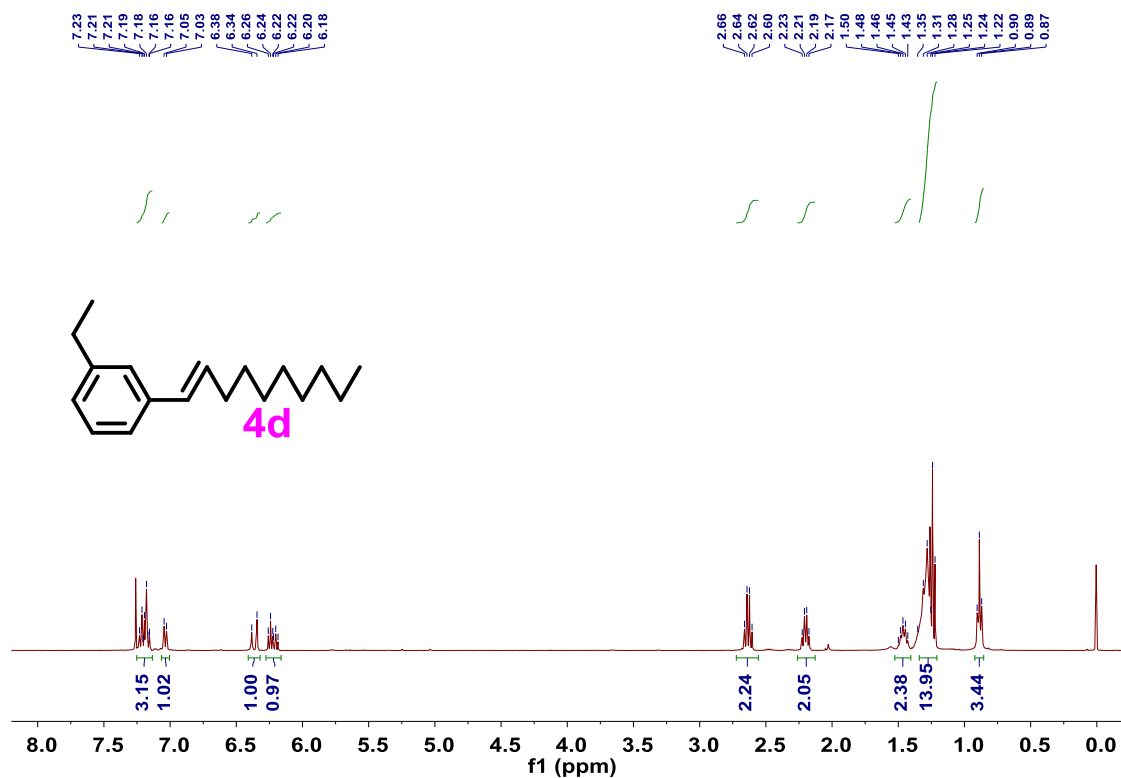

Supplementary Fig. 56 <sup>1</sup>H NMR spectrum of 1-(dec-1-en-1-yl)-3-ethylbenzene.

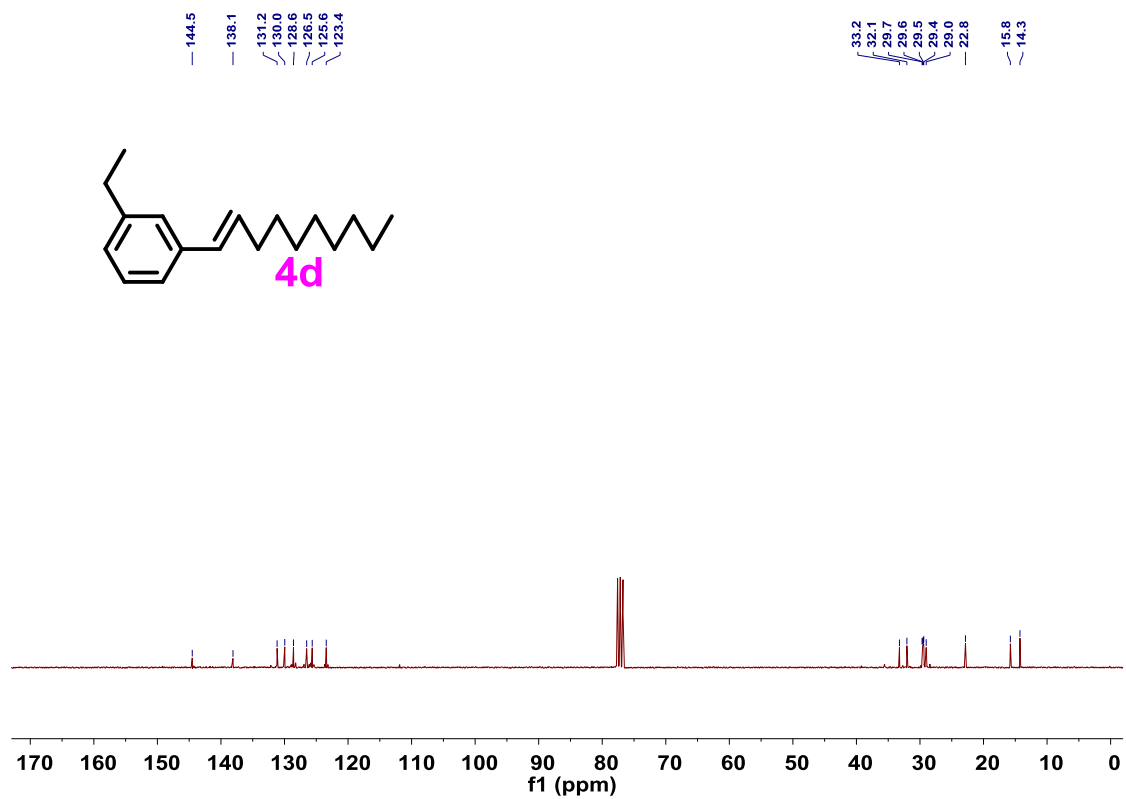

Supplementary Fig. 57 <sup>13</sup>C NMR spectrum of 1-(dec-1-en-1-yl)-3-ethylbenzene.

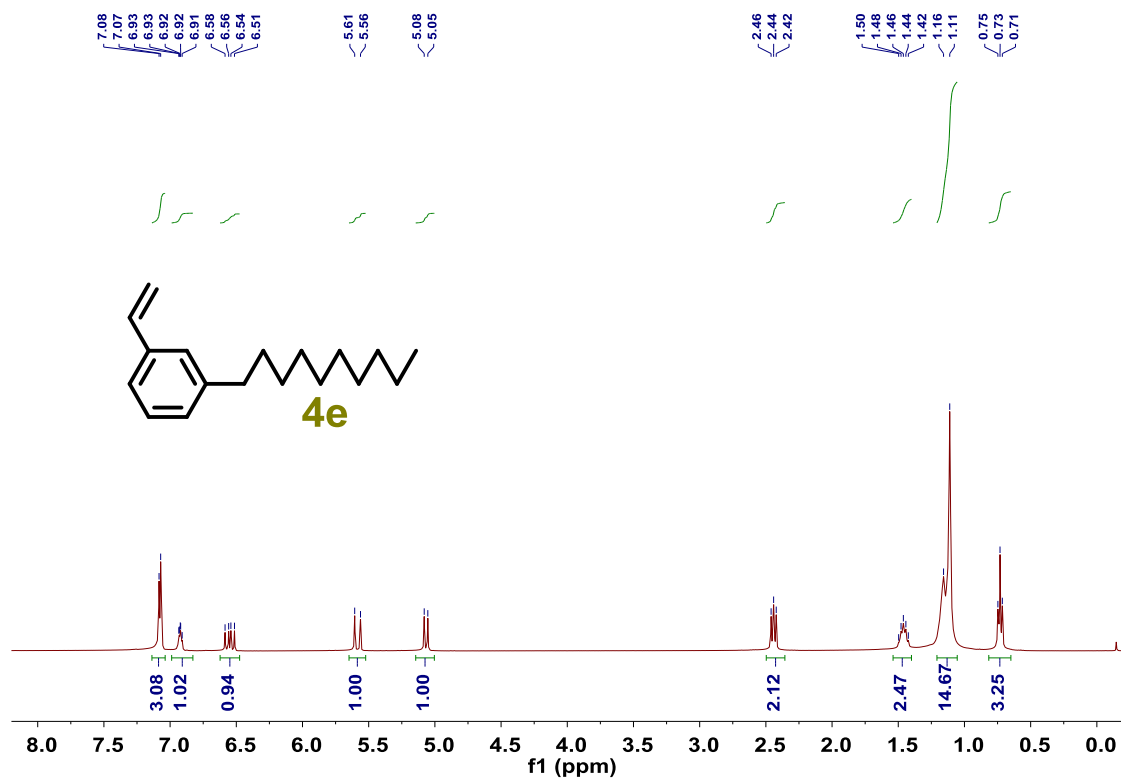

Supplementary Fig. 58  $^{13}\text{C}$  NMR spectrum of 1-decyl-3-vinylbenzene.

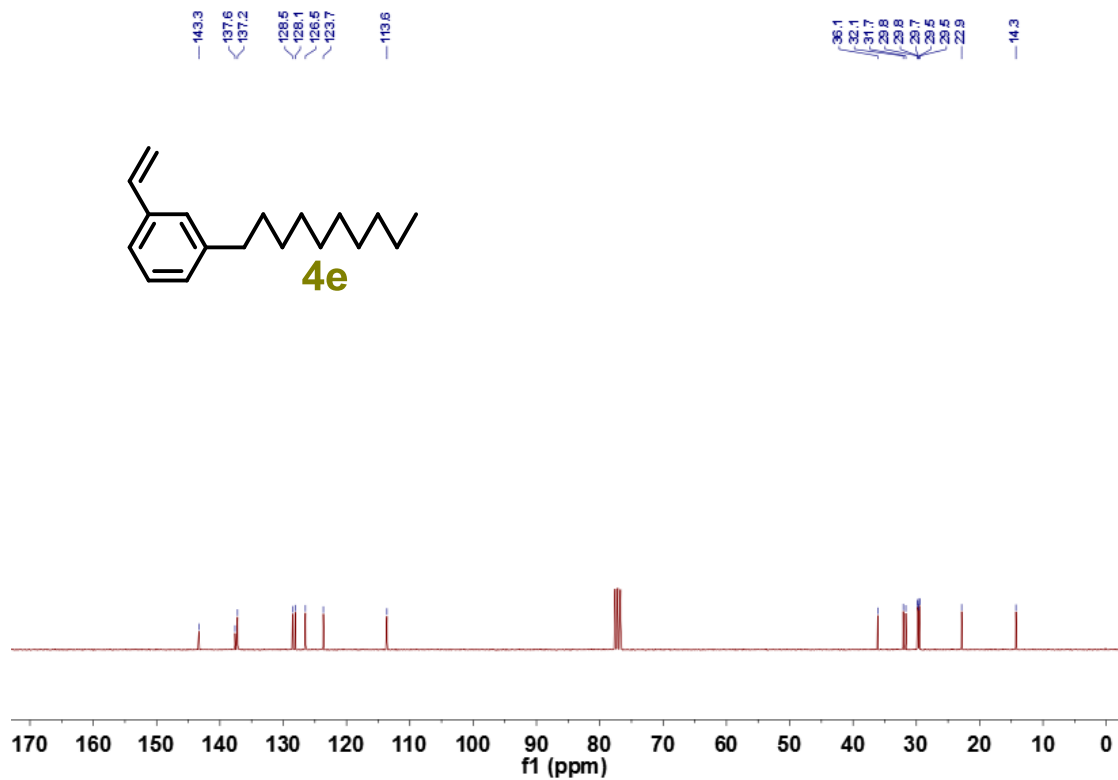

Supplementary Fig. 59  $^{13}\text{C}$  NMR spectrum of 1-decyl-3-vinylbenzene.

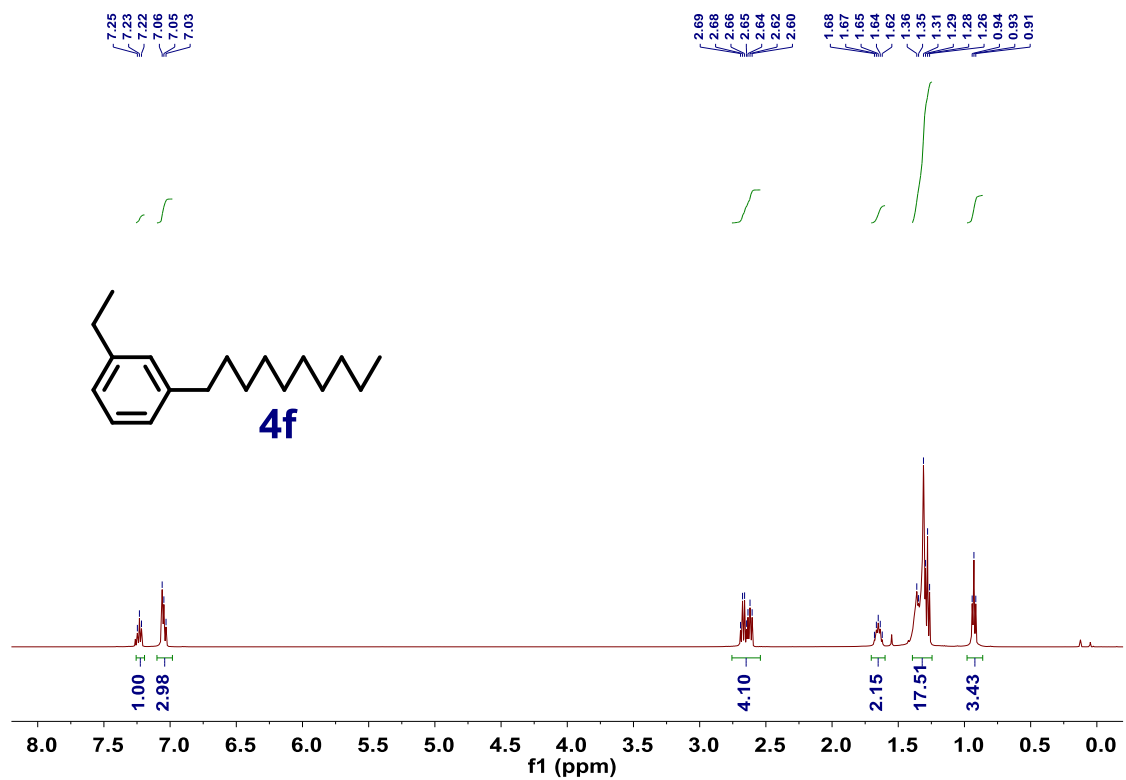

Supplementary Fig. 60  $^{13}\text{C}$  NMR spectrum of 1-decyl-3-ethylbenzene.

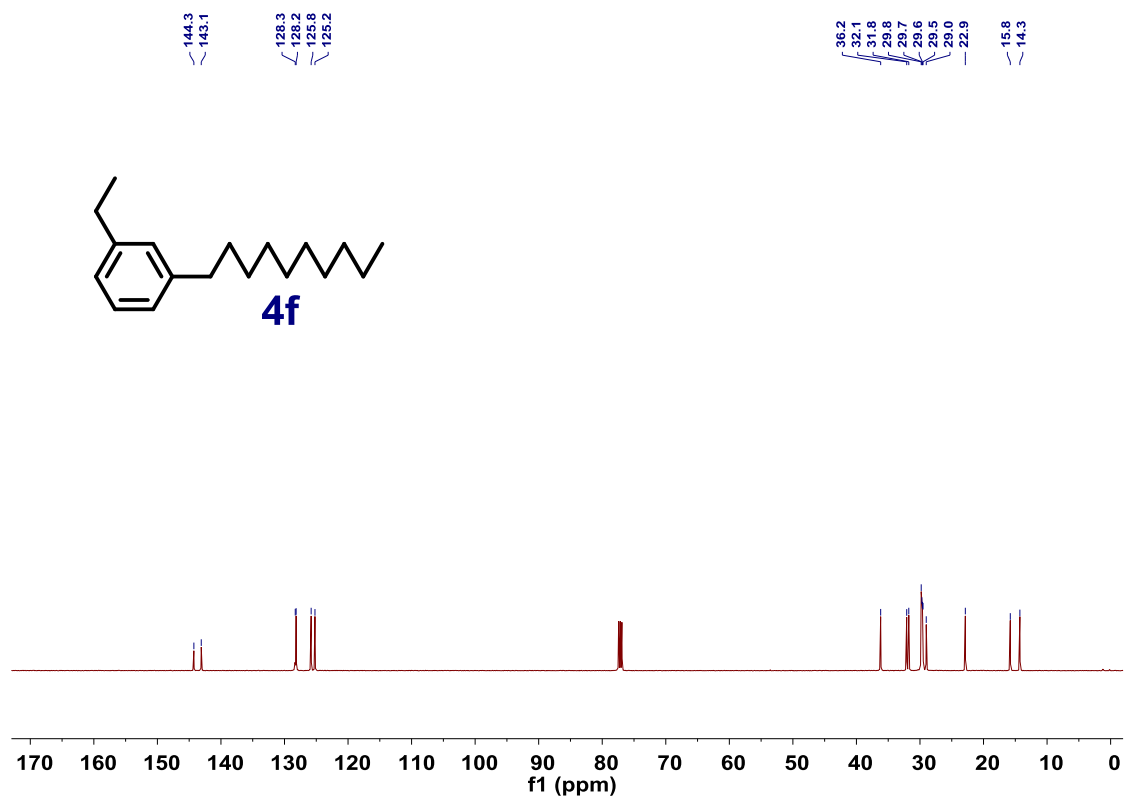

Supplementary Fig. 61  $^{13}\text{C}$  NMR spectrum of 1-decyl-3-ethylbenzene.

## Supplementary References

1. Chen, Y., et al. State-of-the-art aluminum porphyrin-based heterogeneous catalysts for the chemical fixation of CO<sub>2</sub> into cyclic carbonates at ambient conditions. *ChemCatChem* **9**, 767–773 (2017).
2. Stolzenberg, A. M., Haymond, G. S. Activation barriers to meso-aryl group rotation in titanyl tetraarylporphyrins. an investigation of the out-of-plane flexibility of hydroporphyrins. *Inorg. Chem.* **41**, 300–308 (2002).
3. Kumar, R., Chaudhary, N., Sankar, M., Maurya, M. R. Electron deficient nonplanar β-octachlorovanadylporphyrin as a highly efficient and selective epoxidation catalyst for olefins. *Dalton Trans.* **44**, 17720–17729 (2015).
4. Chen, P., et al. Binding of propylene oxide to porphyrin- and salen-M(III) cations, where M = Al, Ga, Cr, and Co. *Inorg. Chem.* **44**, 2588–2595 (2005).
5. Han, Y., et al. Singly versus doubly reduced nickel porphyrins for proton reduction: experimental and theoretical evidence for a homolytic hydrogen-evolution reaction. *Angew. Chem. Int. Ed.* **55**, 5457–5462 (2016).
6. Ke, W.-z., et al. Synthesis and properties of a meso-tetraphenylporphyrin and its Zn(II) complex with a dicyanoisophorone linked by double bond in the β pyrrolic position. *Inorg. Chem. Commun.* **14**, 1311–1313 (2011).
7. Bajju, G. D., et al. Synthesis, spectroscopic and biological studies on new zirconium(IV) porphyrins with axial ligand. *Bioinorg. Chem. Appl.*, **2013**, 903616 (2013).
8. Motorina, E. V., Lomova, T. N., Troshin, P. A., Klyuev, M. V. Novel 2'-(pyridin-4-yl)-5'-(pyridin-2-yl)-1'-(pyridin-2-yl)methylpyrrolidinyl[60]fullerene-hydroxyoxo(5,10,15,20-tetraphenyl-21H,23H-porphinato) molybdenum(V) dyads. *Russ. J. Gen. Chem.* **84**, 946–952 (2014).
9. Tanaka, K., et al. Auxiliary-directed oxidation of ursolic acid by 'Ru'-porphyrins: chemical modulation of cytotoxicity against tumor cell lines. *Tetrahedron Lett.* **53**, 1756–1759 (2012).
10. Nakamura, M., et al. Self-assembled molecular gear: A 4:1 complex of Rh(III)Cl tetraarylporphyrin and tetra(p-pyridyl)cavitand. *J. Am. Chem. Soc.* **138**, 12564–12577 (2016).
11. Wang, R.-F., et al. A hydrogen-bonded-supramolecular-polymer-based nanoprobe for ratiometric oxygen sensing in living cells. *Adv. Funct. Mater.* **26**, 5419–5425 (2016).
12. Bichan, N. G., Tyulyaeva, E. Y., Lomova, T. N. Structure and stability of H<sup>+</sup> associates of (5,10,15,20-tetraphenylporphinato)silver(II) in trifluoroacetic acid. *Russ. J. Phys. Chem. A* **88**, 1345–1350 (2014).
13. Azenha, E. G., et al. Heavy-atom effects on metalloporphyrins and polyhalogenated porphyrins. *Chem. Phys.* **280**, 177–190 (2002).
14. Xu, L., Zhai, M.-K., Lu, X.-C., Du, H.-B. A robust indium-porphyrin framework for CO<sub>2</sub> capture and chemical transformation. *Dalton Trans.* **45**, 18730–18736 (2016).
15. Bai, D., Duan, S., Hai, L., Jing, H. Carbon dioxide fixation by cycloaddition with epoxides, catalyzed by biomimetic metalloporphyrins. *ChemCatChem* **4**, 1752–1758 (2012).
16. Santria, A., Fuyuhiro, A., Fukuda, T., Ishikawa, N. Synthesis of a series of heavy Lanthanide(III) monoporphyrinato complexes with tetragonal symmetry. *Inorg. Chem.* **56**, 10625–10632 (2017).

17. Motorina, E. V., Lomova, T. N. Hydroxyoxo(5,10,15,20-tetraphenylporphinato)tungsten(V) as a receptor for foodstuff and drug components. Thermodynamics of supramolecular complexation. *Russ. J. Inorg. Chem.* **55**, 727–733 (2010).
18. Wang, J.-C., et al. Enantioselective intramolecular carbene C-H insertion catalyzed by a chiral iridium(III) complex of D<sub>4</sub>-symmetric porphyrin ligand. *ACS Catal.* **3**, 1144–1148 (2013).
19. Borisov, S. M., Klimant, I. Efficient metalation in diphenyl ether - A convenient route to luminescent platinum(II) complexes. *Dyes Pigm.* **83**, 312–316 (2009).
20. Dixon, I. M., Collin, J.-P., Sauvage, J.-P., Flamigni, L. Porphyrinic dyads and triads assembled around iridium(III) bis-terpyridine: Photoinduced electron transfer processes. *Inorg. Chem.* **40**, 5507–5517 (2001).
21. Gomes, M. L., et al. Synthesis and characterization of bismuth(III) and antimony(V) porphyrins: high antileishmanial activity against antimony-resistant parasite. *J. Biol. Inorg. Chem.* **20**, 771–779 (2015).
